1 **Sequential accumulation of dynein and its regulatory proteins at the spindle**  
2 **region in the *Caenorhabditis elegans* embryo**

3 **Takayuki Torisawa<sup>1,2</sup> and Akatsuki Kimura<sup>1,2</sup>**

4

5 **Affiliations**

6 <sup>1</sup>Cell Architecture Laboratory, National Institute of Genetics, Mishima, Japan

7 <sup>2</sup>Department of Genetics, The Graduate University for Advanced Studies, Sokendai, Mishima, Japan

8

9 **Running Head**

10 Dynein accumulation at spindle region

11 **ABSTRACT**

12 Cytoplasmic dynein is responsible for various cellular processes during the cell cycle. The  
13 mechanism by which its activity is regulated spatially and temporarily inside the cell remains  
14 elusive. There are various regulatory proteins of dynein, including dynactin, NDEL1/NUD-2, and  
15 LIS1. Characterizing the spatiotemporal localization of regulatory proteins *in vivo* will aid  
16 understanding of the cellular regulation of dynein. Here, we focused on spindle formation in the  
17 *Caenorhabditis elegans* early embryo, wherein dynein and its regulatory proteins translocated from  
18 the cytoplasm to the spindle region upon nuclear envelope breakdown (NEBD). We found that (i) a  
19 limited set of dynein regulatory proteins accumulated in the spindle region, (ii) the spatial  
20 localization patterns were distinct among the regulators, and (iii) the regulatory proteins did not  
21 accumulate in the spindle region simultaneously but sequentially. Furthermore, the accumulation of  
22 NUD-2 was unique among the regulators. NUD-2 started to accumulate before NEBD (pre-NEBD  
23 accumulation), and exhibited the highest enrichment compared to the cytoplasmic concentration.  
24 Using a protein injection approach, we revealed that the C-terminal helix of NUD-2 was responsible  
25 for pre-NEBD accumulation. These findings suggest a fine temporal control of the subcellular  
26 localization of regulatory proteins.

## 27 INTRODUCTION

28 Cytoplasmic dynein I is a molecular motor that moves along a microtubule towards its minus-end  
29 (King, 2011). Cytoplasmic dynein I is responsible for and plays a vital role in a substantial extent of  
30 the minus-end-directed transport in animal cells (Roberts *et al.*, 2013). In this study, we referred to  
31 cytoplasmic dynein I as dynein for simplicity. A striking feature of dynein is that the heavy chain,  
32 including ATP hydrolysis sites and a microtubule-binding domain, is encoded by a single gene  
33 (Pfister *et al.*, 2006). This is in contrast to kinesins, which are also recognized as microtubule-based  
34 motors that mostly move towards the plus-end of microtubules. In case of kinesins, there are multiple  
35 genes encoding kinesin motors that share a similar motor domain; additionally, specific types of  
36 kinesin are expressed at specific times and are localized to specific regions to perform specific  
37 functions (Hirokawa *et al.*, 2009; Cross and McAinsh, 2014). To demonstrate dynein-associated  
38 cellular functions, it is imperative that the cell utilizes a single type of dynein heavy chain at various  
39 times and locations in a regulated manner. Therefore, the regulation of the localization, timing, and  
40 activity of dynein should be sophisticated and should occur at multiple levels, from intramolecular  
41 regulation to regulation at the population level (Kardon and Vale, 2009; Reck-Peterson *et al.*, 2018;  
42 Torisawa and Kimura, 2020). An example of intramolecular regulation is an autoinhibition  
43 mechanism in which the isolated, solely existing dynein tends to assume a characteristic phi-shaped  
44 form and only shows diffusive movements along microtubules (Torisawa *et al.*, 2014; Zhang *et al.*,  
45 2017).

46 Dynein is associated with various regulatory proteins. Dynactin is a major regulatory protein  
47 for dynein. Dynactin associates with dynein and demonstrates the formation of a complex at various  
48 cellular sites (Reck-Peterson *et al.*, 2018). The formation of a complex with dynactin is one of the  
49 mechanisms to release dynein from the autoinhibited state, and it provides the basis for the formation  
50 of larger complexes with various regulatory proteins (Olenick and Holzbaur, 2019). In addition to  
51 dynactin, several regulatory proteins, such as LIS1, NDEL1/NDE1, and NuMA exist. LIS1 controls  
52 the force generation of dynein and aids formation of the dynein-dynactin complex (McKenney *et al.*,  
53 2010; Elshenawy *et al.*, 2020; Htet *et al.*, 2020; Marzo *et al.*, 2020). NDE1/NDEL1 is known to aid  
54 the establishment of interaction between LIS1 and dynein (Yamada *et al.*, 2008; McKenney *et al.*,  
55 2010; Torisawa *et al.*, 2011). NuMA catalyzes the recruitment of dynein to the cell cortex to  
56 facilitate the formation of cortical force generators (Kiyomitsu, 2019). The dynein molecules for the  
57 complex should be reserved at the bulk cytoplasm; however, the mechanism and the timing for the  
58 formation of the complex remain elusive. In many organisms, dynein is found throughout the  
59 cytoplasm (Portegijs *et al.*, 2016; Schmidt *et al.*, 2017; Heppert *et al.*, 2018). However, a pertinent

60 question exists: do such dyneins exhibit the formation of a complex with regulatory proteins before  
61 being recruited to specific functional sites? Such a question is especially important when a new  
62 microtubule-associated structure is formed in a cell according to temporal cues.

63 A prominent example of the temporal and spatial regulation of dynein is the formation of  
64 mitotic spindles. Dynein is excluded from the nucleus during interphase, but is incorporated into the  
65 spindle during mitosis and plays an important role in spindle formation and function (Vaisberg *et al.*,  
66 1993). In spindle formation, nuclear envelope breakdown (NEBD) enables the movement of  
67 cytoplasmic molecules into the nuclear region. Dynein and the regulatory proteins involved in  
68 spindle formation, such as dynactin, NuMA, LIS1, and NDEL1/NDE1, are translocated into the  
69 region (Raaijmakers *et al.*, 2013). Apart from the proteins related to dynein, spindle component  
70 proteins, including tubulin and associated proteins, also present with accumulation in the spindle  
71 region. In the *Caenorhabditis elegans* embryo, the dynein heavy chain, as well as tubulin and other  
72 molecules, were observed to undergo accumulation in the nuclear area after NEBD, but such events  
73 were independent of spindle formation (Hayashi *et al.*, 2012). We proposed that tubulin and other  
74 molecules could accumulate in the area before spindle formation and referred to this transiently  
75 formed area as ‘nascent spindle region’ (Hayashi *et al.*, 2012). The detailed timing and localization  
76 of the proteins undergoing accumulation in the nascent spindle region have not been examined thus  
77 far. It has been naively assumed that these proteins translocate to the nascent spindle region  
78 simultaneously upon NEBD without specific regulations.

79 In this study, we analyzed the accumulation of dynein and its regulatory proteins at the  
80 spindle region to understand the mechanism by which spatiotemporal regulation of dynein was  
81 achieved during spindle formation in *Caenorhabditis elegans* embryos. Quantitative analysis of the  
82 accumulation phenomena showed variations in the initial events of accumulation, the maximum  
83 accumulated amount, and the accumulation rate. Chemical perturbation revealed that the proteins  
84 also differed in the accumulation sites within the spindle region, including the spindle microtubules,  
85 chromosomes, and/or bulk nucleoplasm. Among the proteins analyzed, NUD-2, a *C. elegans*  
86 ortholog of NDEL1/NDE1, showed a characteristic accumulation that commenced before NEBD.  
87 This earlier accumulation process was observed to be dependent on the Ran GTPase activity. The  
88 depletion of NUD-2 reduced the ability of the spindle region to retain the accumulated proteins, but  
89 it did not affect the accumulation process itself. Furthermore, using the injection technique for the  
90 recombinant proteins, we found that the C-terminal helix region of NUD-2 was necessary for its  
91 accumulation before NEBD. Our results suggest the implication of the accumulation phenomena for  
92 the spatiotemporal regulation of cytoplasmic dynein during the formation of mitotic spindles.

## 93 RESULTS

### 94 Accumulation of endogenously tagged dynein and its regulators during spindle formation in *C.* 95 *elegans* early embryos

96 To investigate the spatiotemporal regulation of dynein and its regulatory proteins during spindle  
97 formation, we observed accumulation events of dynein and its regulatory proteins in *C. elegans* early  
98 embryos. Previous studies have shown that dynein and certain regulatory proteins are localized in the  
99 spindle region, as evidenced via transgene expression (Cockell *et al.*, 2004; Hayashi *et al.*, 2012). In  
100 this study, we used specific worm strains expressing the heavy chain of cytoplasmic dynein I, the  
101 p150 subunit of dynactin complex, and several other regulatory proteins, including LIS-1, NUD-  
102 2/NDEL1, and LIN-5/NuMA, from the endogenous locus (**Table S1**). These proteins were selected  
103 because they have been known to be involved in mitosis, with presence reported in the cytoplasm  
104 during interphase. Other regulatory proteins, including SPDL-1/Spindly and NUD-1/NudC, are  
105 primarily localized in the nucleus (Aumais *et al.*, 2003; Gassmann *et al.*, 2008). We constructed a  
106 new worm strain expressing hsGFP-tagged DHC-1 using the CRISPR/Cas9 method (see Materials  
107 and Methods). To observe other proteins, we utilized the strains reported in previous studies  
108 (Heppert *et al.*, 2018).

109 Using confocal microscopy, we observed the NEBD-dependent accumulation of dynein,  
110 dynactin, LIN-5, LIS-1, and NUD-2 in the spindle region (**Figure 1A; Movie S1**). In *C. elegans*,  
111 nuclear pore complexes (NPCs) undergo disassembly that is initiated in prophase, and the  
112 permeability barrier between the nucleoplasm and cytoplasm is lost in prometaphase (Lee *et al.*,  
113 2000; Tzur and Gruenbaum, 2013), thereby enabling diffusion of the mitotic proteins in the  
114 cytoplasm into the spindle region. Based on the permeability, we referred to this change in the  
115 nucleocytoplasmic barrier as *C. elegans* nuclear envelope breakdown (CeNEBD) in a previous study  
116 (Hayashi *et al.*, 2012). To establish controls, we considered BICD-1 and ZYG-12 as candidates for  
117 non-accumulating proteins. BICD-1 is known as a single *C. elegans* ortholog of the BicD family  
118 protein (Aguirre-Chen *et al.*, 2011), and ZYG-12 is considered as the *C. elegans* ortholog of the  
119 Hook family proteins (Malone *et al.*, 2003). Both BicD and Hook are recognized as adaptor proteins  
120 of dynein for intracellular transport (Olenick and Holzbaur, 2019) and have been hypothesized to  
121 play minor roles in mitosis. As expected, we did not observe accumulation of BICD-1 or ZYG-12. A  
122 signal of BICD-1 was not detected as previously described (Heppert *et al.*, 2018); we only observed  
123 the autofluorescence signals in the GFP channel (Heppert *et al.*, 2016). In contrast, we found that  
124 ZYG-12 existed in the early embryos and was localized mainly in the nuclear membrane, as  
125 previously described (Malone *et al.*, 2003).

126 Observations of dynein and regulatory proteins expressed from endogenous loci enabled the  
127 quantification of the amounts and stoichiometry of the accumulated proteins. In the analysis, we  
128 assumed that the expression levels of the endogenously tagged proteins were not largely affected by  
129 the tags, and that the amount of protein and the fluorescence intensity exhibited a linear relationship.  
130 We first quantified the signal intensity in the cytoplasm before pronuclear formation (cytoplasm  
131 intensity or CI) as an index reflecting the total amount of protein inside the cell (Fig. 1C). The  
132 amount of protein varied considerably among the dynein and regulatory proteins. Next, we  
133 quantified the average intensity at the nuclear/spindle region (nuclear intensity or NI), and the value  
134 at the brightest time point was plotted (Fig. 1D). The variation in the CI was roughly preserved for  
135 the NI with one exception, i.e., the NI of NUD-2 protein increased to a level comparable to that of  
136 dynein and dynactin, while the CI of NUD-2 was the lowest among the proteins investigated here.  
137 This exception was evident when we calculated the N/C ratio, the value obtained by dividing the NI  
138 by the CI (Fig. 1E). As expected, NUD-2 showed a higher degree of enrichment compared to the  
139 other proteins. This suggested the possibility that NUD-2 accumulated with a specific mechanism to  
140 help achieve a concentration comparable to that of dynein. Another interesting feature of the N/C  
141 ratio, except NUD-2, was that it was almost constant, while the total amount of the proteins (CI)  
142 varied. A simple explanation might be that these proteins shared a common import/export  
143 mechanism, and thus that the equilibrium ratio was constant.

#### 144 145 **Variations in the target sites of accumulations among the proteins**

146 To further investigate the nature of accumulation of dynein and its regulatory proteins, we focused  
147 on the spatial distribution of the accumulated proteins. We assumed three candidate sites for  
148 accumulation in the spindle regions, namely kinetochores, spindle microtubules, and bulk spindle  
149 regions (**Figure S2A**). The former two sites are well-known associated regions of dynein and several  
150 regulatory proteins (Heald and Khodjakov, 2015). Owing to the abundance of microtubules at the  
151 spindle region, it could not be easily ascertained whether a protein was bound to microtubules or  
152 whether accumulation occurred at other sites in the spindle. To eliminate the effects of contribution  
153 of microtubules, we used nocodazole treatment and observed the embryos with microtubules  
154 depolymerized. In the nocodazole-treated embryos, LIS-1, NUD-2, and LIN-5 continue to  
155 demonstrate evident accumulation around the time of CeNEBD, an event which has been reported to  
156 correspond to the accumulation at the nascent spindle region (**Figures 2A-C and Movie S2**). LIS-1  
157 and NUD-2 later accumulated around the chromosomes (**Figures 2A and B**), while LIN-5 was  
158 excluded from the chromosome region (**Figure 2C, arrowheads**). As the *C. elegans* chromosome is

159 holocentric, exhibiting possession of multiple kinetochores along the entire length of the  
160 chromosome, the localization of LIS-1 around the chromosome has been assumed to be associated  
161 with kinetochores, a finding which is consistent with that reported in a previous study (Cockell *et al.*,  
162 2004; Simões *et al.*, 2018).

163 In contrast, dynein and dynactin did not show apparent accumulation in the bulk spindle  
164 region, indicating that spindle microtubule accumulation at the spindle shown in Figure 1A was  
165 mediated by spindle microtubules. Under the nocodazole-treated condition, late accumulation was  
166 observed at the chromosomes (**Figures 2D and 2E, and Movie S2**). Such findings on chromosomal  
167 accumulations were consistent with those reported in previous studies (Gassmann *et al.*, 2008; Bader  
168 and Vaughan, 2010). This finding indicated that both proteins accumulated in the spindle region  
169 through the establishment of interaction with kinetochores and spindle microtubules. These spatial  
170 patterns of accumulation were also confirmed in the *tbb-2 (RNAi)* embryos, where tubulin expression  
171 was impaired (**Figure S2B**). Our results indicated that the proteins showed a spatial variation in their  
172 accumulation, and a few proteins could accumulate independently of spindle microtubules. In terms  
173 of dynein regulation, the results suggest that accumulation in the nascent spindle region before  
174 dynein recruitment may contribute to the efficient formation of the required complex.

175

### 176 **Variations in the timing of accumulations**

177 In our previous analyses, we showed that tubulin accumulated in the nascent spindle region with the  
178 occurrence of CeNEBD and suggested that other proteins could also enter the region upon CeNEBD  
179 (Hayashi *et al.*, 2012). In the present study, however, we observed that NUD-2 entered and  
180 accumulated in the nuclear region before NEBD (**Figure 3A**). Interestingly, NUD-2 is unique among  
181 dynein regulatory proteins because of its unique timing of accumulation and high N/C ratio (**Figure**  
182 **1B**). The accumulation mechanism of NUD-2 has been discussed in detail in later sections. Inspired  
183 by the early accumulation events of NUD-2 and the distinct localization pattern in the spindle region  
184 (**Figure 2**), we investigated the accumulation timing of dynein and the regulatory proteins  
185 comprehensively. We analyzed the time series of the N/C ratio of dynein and the regulatory proteins  
186 in the 1-cell stage *C. elegans* embryos. The time series of the N/C ratio indicated that these proteins  
187 did not accumulate in the spindle region simultaneously (**Figure 3A**). NUD-2 accumulated earliest  
188 among the proteins, followed by LIS-1 and LIN-5. After the accumulation of tubulin, dynein and  
189 dynactin accumulated at similar times. This finding was consistent with that of the spatial analysis  
190 described above, which suggested that dynein and dynactin accumulated mainly through the  
191 establishment of interaction with microtubules. There were no apparent differences in the  
192 accumulation rates among the proteins.

193 Although our observations suggested a sequential accumulation pattern of dynein and the  
194 regulatory proteins, it has been demonstrated based on experiments conducted using different strains  
195 expressing each protein fused to the fluorescent protein. To further investigate whether the timing of  
196 accumulation of the two proteins was the same, we conducted simultaneous observations of dynein  
197 and the regulatory proteins by constructing the strains simultaneously expressing the two  
198 fluorescently labeled proteins (**Figure 3B and Table S1**). We found that NUD-2, LIS-1, and LIN-5  
199 accumulated earlier than dynein, as suggested by previous observations, whereas dynactin showed  
200 approximately the same timing of accumulation (**Figures 3B and 3C**). In the case of LIN-5, NUD-2,  
201 and LIS-1, the simultaneous observations revealed marked differences in accumulation patterns,  
202 suggesting that these proteins were not associated with dynein upon entry into the spindle region.  
203 The simultaneous accumulation of dynein and dynactin suggested that a considerable fraction of the  
204 proteins demonstrated association with each other in the cytoplasm and presented with transportation  
205 as complexes. Interestingly, although dynein and dynactin gradually accumulated almost  
206 simultaneously, they displayed a different pattern around the time of saturation; when the  
207 accumulation speed of dynactin decreased, dynein continued to exhibit a maximum accumulation  
208 speed (**Figure 3C**). These results suggest that at least a certain proportion of the accumulated dynein  
209 did not form a complex with dynactin.

### 210 211 **Molecular weight is not the determinant of accumulation order**

212 We observed that the timing of accumulation differed between dynein and its regulatory proteins.  
213 The proteins were expected to enter the spindle region mainly through diffusion because NPCs,  
214 which act as a diffusion barrier and as a mediator for active nucleocytoplasmic transport, underwent  
215 disassembly by that time (Tzur and Gruenbaum, 2013). Thus, we hypothesized that the difference in  
216 diffusion rate depending on molecular weight accounted for the temporal difference. This hypothesis  
217 was supported by the fact that the accumulation order of dynein-regulatory proteins coincided with  
218 the order of molecular weights; NUD2 (~69 kDa) accumulated first, followed by LIS-1 (92 kDa) and  
219 LIN-5 (187 kDa), with final accumulation of dynactin and dynein (>1.2 M) (**Figure 3A**). To examine  
220 the effect of molecular weight on the accumulation, we observed the temporal dynamics of polymers  
221 with defined molecular sizes using an injection method (**Figure S3A**) (Galy *et al.*, 2003; Updike *et*  
222 *al.*, 2011). We incorporated polymers of different sizes into *C. elegans* embryos through oogenesis  
223 and compared the temporal dynamics.

224 Although previous studies have reported the presence of injected dextran in interphase  
225 embryos (Galy *et al.*, 2003; Updike *et al.*, 2011), it was unclear whether they accumulated at the  
226 spindle region during mitosis. Thus, we decided to observe the accumulation events of polyethylene



227 glycol (PEG) as well as dextran. By observing dextran (40 kDa) and PEG (40 kDa) accumulations,  
228 we found that dextran showed CeNEBD-dependent accumulation in the spindle region (**Figure 4A**),  
229 while PEG was excluded from the nucleus throughout the cell cycle (**Figure 4B**). Notably, PEG with  
230 a smaller molecular weight (5 kDa), which was expected to be below the diffusion limit of NPCs,  
231 was also excluded from the nucleus (**Figure S3B**), suggesting that the event of accumulation of a  
232 polymer at the spindle region was dependent on physicochemical properties, such as the existence of  
233 branching in the polymer structure.

234 We then compared the accumulation dynamics of dextrans with molecular weights of 3, 40,  
235 70, and 150 k. Dextran (3 kDa) presented with continuous accumulation in the nuclear region  
236 throughout the cell cycle (**Figure 4D**), probably because the molecular weight was below the  
237 diffusion threshold of the nuclear pore complex (**Figure 4D**). Other dextrans exhibited CeNEBD-  
238 dependent accumulation at the nascent spindle region (**Figure 4A and Movie S3**). As depicted in the  
239 time series based on the N/C ratios, dextrans accumulated only after CeNEBD (**Figure 4E**). The time  
240 series also did not demonstrate any marked difference in the timing of dextran accumulation (**Figure**  
241 **4E**); at least the difference could not be considered to explain the difference between LIS-1 (92 kDa)  
242 and LIN-5 (187 kDa) by molecular weight (**Figure 3A**). This result indicated that molecular weight  
243 was not a determinant factor for the accumulation order.

244 Although molecular weight was not deemed the determinant, it was notable that exogenous  
245 polymers showed an accumulation pattern similar to that shown by dynein and the regulatory  
246 proteins. Additionally, it was observed that the proteins, dynein and dynactin, mainly accumulated  
247 through the establishment of interaction with microtubules (**Figures 2D and 2E**). Thus, we  
248 examined whether the accumulation of dextran depended on the interaction with microtubules. The  
249 observation of dextran in the nocodazole-treated embryos showed that it continued to accumulate at  
250 the nascent spindle region (**Figure 4F**), indicating that the accumulation of dextran was not  
251 dependent on microtubules such as LIS-1, NUD-2, and LIN-5 (**Figures 2A-C**). Furthermore, similar  
252 to LIN-5, dextrans showed a uniform distribution in the nascent spindle region (**Figure S3D**).  
253 Although the accumulation dynamics of dextrans shared several characteristics with dynein and the  
254 regulatory proteins, dextran did not present with accumulation before CeNEBD, as that observed for  
255 NUD-2, suggesting an additional requirement for such an accumulation pattern.

### 256 257 **Pre-NEBD accumulation of NUD-2 is independent of CeNEBD**

258 Among the proteins observed, NUD-2 showed a distinct accumulation pattern compared with the  
259 other proteins; accumulation started approximately 4 min before CeNEBD and the highest maximum  
260 N/C ratio of approximately 4.5-fold was noted (**Figures 1B and 3A**). This pronounced accumulation

261 before CeNEBD was observed only for NUD-2, and to our knowledge, this was a unique  
262 phenomenon. We termed this phenomenon “pre-NEBD accumulation” and investigated it  
263 comprehensively.

264 We observed that the initiation time of pre-NEBD accumulation was around the time of the  
265 pronuclear meeting. If the pre-NEBD accumulation is dependent on pronuclear meetings, it should  
266 occur only at the 1-cell stage because the pronuclear meeting is specific to the 1-cell stage. However,  
267 this was not the case. We found that pre-NEBD accumulation also occurred in the later stage  
268 embryos (2–16-cell stage; **Figure 5A**). Interestingly, as development proceeded, the degree of  
269 accumulation through pre-NEBD accumulation increased, while the final N/C ratio after post-NEBD  
270 accumulation did not vary among the cell stages (**Figures 5B-D**). In contrast to the early embryos, in  
271 oocyte, NUD-2 did not accumulate to the nuclear region prior to the NEBD of the oocyte meiosis.  
272 The post-NEBD accumulation was observed for the oocyte meiosis (**Figures 5E and 5F**). Moreover,  
273 we found that NUD-2 localized at the nuclear membranes in all oocytes except the most proximal (-  
274 1) one (**Figure 5E**), in contrast to the early embryos. These results suggest that pre-NEBD  
275 accumulation is specific to mitotic division, whereas post-NEBD accumulation is universal to  
276 mitosis and meiosis.

277 We then investigated the relationship between pre-NEBD accumulation of NUD-2 and  
278 CeNEBD. We focused on a key aspect: was pre-NEBD accumulation coupled with CeNEBD? If pre-  
279 NEBD accumulation depends on CeNEBD, the timing of pre-NEBD accumulation between sperm  
280 and oocyte pronuclei will differ in the presence of nocodazole. Nocodazole treatment impairs  
281 pronuclear meeting, which in turn delays NEBD of the oocyte pronucleus due to the lack of signals  
282 from centrosomes attached to the sperm pronucleus (Hachet *et al.*, 2007; Portier *et al.*, 2007; Toya *et*  
283 *al.*, 2011). When NEBD of oocyte pronucleus was delayed, there was no delay in the initiation time  
284 of pre-NEBD accumulation and it occurred at the same time as that of sperm pronucleus (**Figures**  
285 **5G and 5H**). After reaching a value of approximately 1.3, the N/C ratio of the oocyte pronuclei  
286 showed the achievement of a steady state for several minutes, while the N/C ratio of the sperm  
287 pronucleus showed a transition to post-NEBD accumulation. These results suggest that pre-NEBD  
288 accumulation is a distinct process from the post-NEBD accumulation and is regulated by factors  
289 independent of CeNEBD.

## 290 291 **NUD-2 exhibits a distinct accumulation pathway from tubulin**

292 Ran, a small GTPase protein, plays a central role in nuclear transport. A recent study revealed that  
293 Ran contributed to the accumulation of a tubulin chaperone in the nuclear region before NEBD in  
294 *Drosophila melanogaster* (Métivier *et al.*, 2021). We have previously shown that Ran-1 is necessary

295 for the post-NEBD accumulation of tubulin in *C. elegans* embryos (Hayashi *et al.*, 2012). We sought  
296 to ascertain whether Ran was involved in the pre-NEBD accumulation of NUD-2 by conducting  
297 knockdown experiments for *C. elegans* Ran, *ran-1*. In RAN-1-depleted embryos, we confirmed a  
298 reduction in cell size, nuclear size, and observed defects in mitosis (**Figure 6A**), as those previously  
299 described (Gönczy *et al.*, 2000; Askjaer *et al.*, 2002; Bamba *et al.*, 2002). The defect in cytokinesis  
300 maintained the embryos in the 1-cell stage, although the nuclei underwent multiple divisions. Even  
301 under such conditions, we observed the cyclic accumulation of NUD-2 at the sites of histone signals  
302 (**Figures 6A and 6B, and Movie S4**). Such accumulation was not observed for tubulin (**Figures 6C**  
303 **and 6D**), consistent with the finding reported in a previous study, which revealed the contribution of  
304 RAN-1 to tubulin accumulation (Hayashi *et al.*, 2012). These results suggest that NUD-2 exhibits a  
305 different accumulation pathway from tubulin, whose post-NEBD accumulation is dependent on  
306 RAN-1 (Hayashi *et al.*, 2012).

307 To investigate the details of NUD-2 accumulation in RAN-1-depleted embryos, we analyzed  
308 the time series of the N/C ratio. In *ran-1* (RNAi) embryos, we could not determine the timing of  
309 NEBD from the localization pattern of histones, and thus it was difficult to differentiate between pre-  
310 NEBD and post-NEBD accumulation events of NUD-2. As shown in **Figure 6E**, NUD-2 signals  
311 increased at an approximately constant rate. This increasing pattern was somewhat different from the  
312 unperturbed condition where we observed slower accumulation followed by a short constant phase  
313 before NEBD and faster accumulation after NEBD (**Figure 3A**). We considered that either pre- or  
314 post-NEBD accumulation was impaired by *ran-1* (RNAi). By comparing the rate of accumulation,  
315 we found that the accumulation rate under the *ran-1* (RNAi) condition was more similar to that under  
316 the unperturbed condition (**Figure 6E**). Furthermore, the maximum N/C ratio of NUD-2 in the  
317 absence of RAN-1 was estimated to be  $3.8 \pm 1.6$  (based on 7 increase events in 5 embryos),  
318 comparable to that of post-NEBD accumulations under the unperturbed condition ( $4.7 \pm 0.6$ ). These  
319 results suggest that Ran is necessary for pre-NEBD accumulation, but is not vital in the post-NEBD  
320 accumulation of NUD-2. This is in contrast to tubulin, where post-NEBD accumulation is impaired  
321 by *ran-1* (RNAi) (Hayashi *et al.*, 2012). These results suggest that the mechanism of post-NEBD  
322 accumulation is different between NUD-2 and tubulin.

### 323 324 **The spindle region requires NUD-2 to retain the accumulated proteins**

325 We noted a distinct pre-NEBD accumulation timing for NUD-2 compared with other proteins. The  
326 earliest accumulation and the highest N/C ratio of NUD-2 suggested a role for NUD-2 in the  
327 accumulation of other proteins in the spindle region. We observed the accumulation pattern of  
328 dynein and the regulatory proteins LIS-1, dynactin, and LIN-5 in NUD-2-depleted embryos. Even in

329 the absence of accumulated NUD-2, post-NEBD accumulation continued to occur (**Figure 7A**).  
330 However, their localization level at the spindle was lower than that under the unperturbed condition  
331 for all proteins except LIS-1 (**Figures 7A and 7B**). A previous study using the deletion mutant of  
332 NUD-2 has already reported the reduction in LIS-1, dynactin, and dynein at the kinetochore (Simões  
333 *et al.*, 2018), and our observations showed that the reduction also occurred along the entire spindle.  
334 To further investigate the effect of NUD-2 depletion, we analyzed the time series of the N/C ratio.  
335 The derived time series indicated that LIS-1, dynactin, and dynein showed decays in the N/C ratio  
336 after the initial phase of increase (**Figure 7C**). This finding suggested that the ability of the bulk  
337 spindle region to retain the accumulated proteins was impaired in NUD-2-depleted embryos. In  
338 addition to the effect on the temporal dynamics of dynein-regulatory proteins, a previous study  
339 reported chromosome abnormalities in the deletion mutant of *nud-2* (Simões *et al.*, 2018). We  
340 examined chromosome dynamics in NUD-2-depleted embryos and confirmed abnormalities in  
341 chromosome dynamics (**Figure S4**). Approximately half of the embryos showed lagging  
342 chromosomes (13/26 embryos), and more than 80% of the embryos presented with additional histone  
343 signals (20/26 embryos). These abnormalities were consistent with those reported in the previous  
344 study (Simões *et al.*, 2018) and were probably caused by meiosis/mitosis defects (**Figure S5**). Since  
345 dynein has been reported to be involved in chromosome alignment and segregation (Bader and  
346 Vaughan, 2010; Raaijmakers and Medema, 2014), it was difficult to determine whether the  
347 chromosomal abnormalities were attributed to the direct or indirect consequences of NUD-2  
348 depletion. A decrease in the amount of dynein or activation complex in the spindle region may also  
349 be related to abnormalities as an indirect effect.

### 350 351 **The C-terminal helix region of NUD-2 is responsible for pre-NEBD**

352 NDEL1/NDE1, the human ortholog of NUD-2, possesses two distinct structural regions. The N-  
353 terminal region forms an approximately 20 nm-long coiled-coil structure (Derewenda *et al.*, 2007),  
354 whereas the C-terminal region is predicted to be intrinsically disordered. Within the C-terminal  
355 region, NDEL1/NDE1 possesses a putative helix region flanked by two intrinsically disordered  
356 sequences. The N-terminal region includes one of the two dynein-binding sites and the LIS-1 binding  
357 site (Derewenda *et al.*, 2007), aiding binding between LIS-1 and dynein (Zyłkiewicz *et al.*, 2011;  
358 Wang *et al.*, 2013). The C-terminal region contains a second dynein-binding site and many  
359 phosphorylation sites (Niethammer *et al.*, 2000; Yan *et al.*, 2003; Mori *et al.*, 2007; Bradshaw *et al.*,  
360 2008). Based on these structural and functional findings, we investigated the region of NUD-2  
361 necessary for the characteristic pre-NEBD accumulation. For this purpose, we adopted a protein-  
362 injection approach. We injected the recombinant NUD-2 fragments into the *C. elegans* gonad and

363 observed the temporal dynamics of the fragments incorporated into the embryos through oogenesis  
364 (**Movie S5**). Before observing NUD-2 fragments, we validated our injection method by examining  
365 the temporal dynamics of mCherry, which was consistent with that of the transgenic GTP (**Figure**  
366 **S5**).

367 We first observed accumulation of injected full-length NUD-2. Compared to the  
368 endogenous protein (**Figures 1A and 3A**), although the injected full-length NUD-2 accumulated at  
369 the spindle region, it showed a lower maximum N/C ratio and slower accumulation rate, which  
370 resulted in an N/C ratio below 1 at CeNEBD (**Figure 8C**). However, we found that the initiation  
371 time of accumulation was earlier than that of CeNEBD, and there was a change in the accumulation  
372 rate around CeNEBD (**Figure 8C**). Based on these results, we concluded that the injected protein  
373 showed both pre- and post-NEBD accumulation, although the accumulation rate was less than the  
374 endogenous one. The reduction in accumulation might be attributed to the saturation of accumulation  
375 caused by the presence of markedly more NUD-2 level than the control. We then observed the N-  
376 terminal fragment composed of the predicted coiled-coil domain (NUD-2<sub>CC</sub>, 2-165 aa). In contrast to  
377 the full-length construct, NUD-2<sub>CC</sub> was excluded from the pronuclei until CeNEBD, without pre-  
378 NEBD accumulation (**Figures 8B and 8C**). We then observed the C-terminal fragment (NUD-2<sub>IDR</sub>,  
379 166-293 aa) and found that NUD-2<sub>IDR</sub> showed both pre- and post-NEBD accumulations. To further  
380 investigate which region was responsible for pre-NEBD accumulation, we next observed NUD-2<sub>CC-</sub>  
381 <sub>IDR1</sub> (2-238 aa), including the coiled-coil and the following intrinsically disordered regions. NUD-  
382 <sub>2CC-IDR1</sub> was excluded from the interphase nucleus and only accumulated after CeNEBD, which  
383 exhibited the same temporal pattern as NUD-2<sub>CC</sub>. Finally, we observed NUD-2<sub>CC-IDR1-H</sub> (2-276 aa),  
384 which contained the region comprising the N-terminal coiled-coil and the C-terminal helix.  
385 Interestingly, NUD-2<sub>CC-IDR1-H</sub> showed both pre- and post-NEBD accumulations. These results  
386 suggest that the C-terminal helix region is involved in the pre-NEBD accumulation of NUD-2.

## 387 **Discussion**

388 When a molecule demonstrates functions in a cell, it is not always present in the active state;  
389 however, its association with regulators often aids regulation of its activity. In some cases, the  
390 localization of each molecule is controlled spatially and temporally, and the formation of the  
391 complex itself is considered the rate-limiting process, while in other cases, the complex is always  
392 formed and external signals induce the activation. The mechanism of cellular regulation of the  
393 activity of molecular complexes can be studied comprehensively *in vitro*. To understand the actual  
394 cellular regulatory mechanism within a cell, it is necessary to carefully observe the spatiotemporal  
395 dynamics of each molecule *in vivo* and to integrate the available knowledge.

396         Cytoplasmic dynein I is a microtubule-based motor protein that is indispensable for various  
397 cellular processes, including the formation, maintenance, and elongation of mitotic spindles (Roberts  
398 *et al.*, 2013). Recent *in vitro* studies have revealed the mechanism by which dynein forms complexes  
399 with its regulatory proteins and the properties of the complexes (Reck-Peterson *et al.*, 2018; Olenick  
400 and Holzbaur, 2019). Here, we focused on the manner in which dynein localized and functioned at  
401 mitotic spindles after NEBD and investigated the spatiotemporal dynamics of dynein and its  
402 regulatory proteins using *C. elegans* early embryos to understand the mechanism of cellular  
403 regulation of dynein.

404

### 405 **Regulatory proteins accumulate earlier than dynein**

406 We found that dynein and its regulatory proteins did not accumulate simultaneously, but  
407 accumulation occurred in a sequential manner. Several regulatory proteins, including NUD-2, LIS-1,  
408 and LIN-5, gradually accumulated earlier than dynein and dynactin (**Figure 3A**). This accumulation  
409 order was not determined by the molecular weight (**Figure 4**).

410         Among the early accumulating proteins, NUD-2 showed the earliest accumulation that was  
411 initiated before CeNEBD (**Figures 3A and 5A**). We hypothesized that the earliest accumulation of  
412 NUD-2 contributed to the accumulation of other proteins. In NUD-2-depleted embryos, we found  
413 that dynein, dynactin, and LIS-1 gradually accumulated as in the unperturbed embryos, but the  
414 protein concentration in the entire spindle region decreased after the initial accumulation (**Figure**  
415 **7C**). These results indicate that NUD-2 depletion affects the dynamics of later accumulating  
416 proteins.

417         The results obtained via NUD-2 depletion suggest a sequential effect, where earlier  
418 accumulation affects the dynamics of the proteins accumulated later. Based on the following  
419 considerations, this sequential effect seems to demonstrate implications for the intracellular

420 regulation of cytoplasmic dynein (**Figure 9B**). First, NDEL1, a homolog of NUD-2, recruits LIS1 to  
421 dynein (McKenney *et al.*, 2010; Wang *et al.*, 2013). If NUD-2 level decreases in the spindle region,  
422 LIS-1 loses one of the interaction partners and leaks out of the spindle region, leading to a reduction  
423 in the ratio of dynein bound to LIS-1 in the spindle region. Second, recent studies have shown that  
424 LIS1 binding to dynein shifts dynein conformation, promotes dynein-dynactin binding, and  
425 dissociates from dynein after the binding of dynactin to dynein (Qiu *et al.*, 2019; Elshenawy *et al.*,  
426 2020; Htet *et al.*, 2020; Marzo *et al.*, 2020); therefore, a decrease in LIS-1 level decreases the  
427 proportion of the dynein-dynactin complex. In both types of dynein complexes, the duration of the  
428 presence of dynein on microtubules is expected to be longer (McKenney *et al.*, 2010, 2014; Schlager  
429 *et al.*, 2014; Elshenawy *et al.*, 2020; Marzo *et al.*, 2020). A decrease in the proportion of dynein with  
430 a longer duration on microtubules would decrease the affinity for the entire spindle region, leading to  
431 a decrease in the maximum accumulation ratio and the decrease in protein concentration at the  
432 spindle region after the initial accumulation.

433 In the sequential regulatory mechanism discussed above, it is important to determine whether  
434 the concentrations of the proteins are sufficient to enable binding with each other. Since none of the  
435 regulatory proteins observed presented an accumulation level that was markedly lower than that of  
436 dynein (**Figure 1D**), it could be implied that the observed proteins were present in the spindle region  
437 in sufficient amounts to facilitate binding with dynein.

438

### 439 **Accumulation in the bulk spindle region**

440 We found that the proteins accumulated earlier than dynein and dynactin were first localized at the  
441 bulk spindle region (**Figure 2**). This affinity for the bulk spindle region is suggested to enable  
442 protein accumulation in the spindle region before the elongation of spindle microtubules. In contrast,  
443 dynein and dynactin gradually accumulated through spindle microtubules and localized later to the  
444 kinetochores (**Figures 2D and E**). Our previous research showed that DNC-1 accumulated in the  
445 nascent spindle region, but not in a uniform manner (Hayashi *et al.*, 2012). Our present study  
446 revealed that the accumulation was not in the bulk spindle region, but rather occurred at the  
447 kinetochore. The proteins accumulating in the bulk spindle region increase their absolute  
448 concentrations in the spindle region through earlier accumulation, resulting in efficient complex  
449 formation with dynein.

450

### 451 **Mechanism of protein accumulation in the bulk spindle region**

452 A pertinent aspect worth exploration is the mechanism of accumulation in the bulk spindle region.  
453 For accumulation in spindle microtubules and kinetochores, a mechanism through specific protein-  
454 protein interactions can be proposed; however, the possible mechanism of accumulation in the bulk  
455 space should be elucidated. Considering the microscopic accumulation process, it is hypothesized  
456 that the protein molecules may enter the spindle region mainly through diffusion (“on” process) since  
457 it occurs after NPCs are disassembled. Some molecules may exit the region through diffusion (“off”  
458 process); however, if a mechanism exists for the entrapment of the molecules in the spindle region, it  
459 may result in the accumulation of the molecules. The balance between on and off states is assumed to  
460 be different depending on the molecule, and the accumulation in the bulk spindle region may be  
461 possible when this on-off relationship satisfies certain conditions. The balance between the on and  
462 off is also affected by other accumulated proteins. The accumulation of a molecule with a high  
463 affinity for the spindle region may increase the affinity of the molecule, which accumulates later.  
464 Additionally, it is notable that accumulation was observed to a certain extent, even for dextran,  
465 which was not expected to establish interactions specifically with intracellular molecules; such an  
466 event was not observed with PEGs (**Figure 4**). The accumulation itself may occur if properties, such  
467 as charge, hydrophilicity, and structure, are satisfied. Of course, the possibility that some factors in  
468 the nucleus specifically recruit proteins cannot be excluded from this study alone.

#### 469 470 **Mechanism and implication of pre-NEBD accumulation of NUD-2**

471 We assumed that the pre-NEBD accumulation of NUD-2 was related to nucleocytoplasmic transport  
472 and NUD-2 dynamics in *ran-1* (RNAi) embryos (**Figure 6A**). In RAN-1-depleted embryos, NUD-2  
473 showed only post-NEBD accumulation, suggesting that nucleocytoplasmic transport mediated pre-  
474 NEBD accumulation (**Figure 6B**). This RAN-1 independence of post-NEBD accumulation of NUD-  
475 2 was in contrast to that of tubulin (**Figures 6C and 6D**) (Hayashi *et al.*, 2012). Regarding the pre-  
476 NEBD accumulation of NUD-2, we also found that the C-terminal putative helix region was  
477 essential for the protein injection approach (**Figure 8**). Previous studies have shown that the C-  
478 terminal region of NDEL1/NDE1 comprises many phosphorylation sites and a dynein binding site,  
479 and can bend back onto the N-terminal coiled-coil (Feng *et al.*, 2000; Niethammer *et al.*, 2000;  
480 Sasaki *et al.*, 2000; Yan *et al.*, 2003; Liang *et al.*, 2004; Toyo-Oka *et al.*, 2005; Guo *et al.*, 2006;  
481 Mori *et al.*, 2007; Bradshaw *et al.*, 2008; Torisawa *et al.*, 2011; Soares *et al.*, 2012). As suggested by  
482 Soares *et al.*, phosphorylation in the C-terminal region might affect the overall molecular structure of  
483 NUD-2 and could induce pre-NEBD accumulation.

#### 484 485 **Applications of protein injection approach**



486 Previous studies have reported the use of exogenous polymers to investigate the permeability of  
487 nuclear membranes (Galy *et al.*, 2003; Updike *et al.*, 2011), and we used the same technique in this  
488 study (**Figure 4**). In this study, we have shown that the intracellular dynamics of recombinant  
489 proteins can be observed by injecting proteins purified from *E. coli* (**Figure 8**). The advantage of this  
490 method is that the results can be obtained in a shorter time (typically in 1 week or 2 weeks) than the  
491 observations obtained using transgenic worms, which requires the establishment of new worm  
492 strains.

493

#### 494 **Universality and diversity of accumulation and its role in cellular regulation of dynein**

495 Nuclear accumulation of proteins during mitosis has also been observed in *D. melanogaster* (Yao *et al.*  
496 *al.*, 2012; Schweizer *et al.*, 2015; Métivier *et al.*, 2021). One characteristic shared by both organisms  
497 is that their mitosis is semi-open (Makarova and Oliferenko, 2016), in which the nuclear envelope  
498 disrupts only partially, not completely, during mitosis. The affinity of the substance for the spindle  
499 region of the bulk may differ between cases in which all NEs collapse (open mitosis) and those in  
500 which they do not (semi-open or semi-closed).

501 The accumulation of components required for spindle formation is essential for mitosis, and  
502 dynein is a crucial molecule in this process. It will be desirable to study the spatiotemporal dynamics  
503 of dynein and its regulatory proteins in species with different modes of mitosis and to compare the  
504 mechanisms employed in individual organisms to achieve the universality and diversity of the  
505 accumulation phenomenon.

## 506 MATERIALS & METHODS

### 507 *C. elegans* strains

508 The worm strains used in this study have been summarized in Table S1 and were maintained at 22 °C  
509 on standard nematode growth medium (NGM) plates with OP50 *Escherichia coli*. To establish worm  
510 strains expressing both histone and dynein-regulatory proteins, we used LP451 (expressing NUD-  
511 2::mNG), LP563 (mNG::DNC-1), LP585 (LIN-5::mNG), and LP591 (LIS-1::mNG), provided by the  
512 *Caenorhabditis* Genetics Center. The strains were subjected to crossing experiments with CAL0941  
513 that expressed mCherry-fused HIS-58. CAL2221, which was used to visualize dynein, was  
514 established for this study using the CRISPR/Cas9 method (Dickinson and Goldstein, 2016). The  
515 guide RNA was designed to the 5'-terminal of exon1 of *dhc-1* and the rescued fragment containing  
516 full-length *dhc-1* sequence fused with hsGFP was injected into the gonads of young adult N2 worms  
517 with pRF4, a plasmid used for *rol* mutant screening. hsGFP is a recombinant GFP containing 6xHis-  
518 tag and streptavidin-binding peptide tag (Kobayashi *et al.*, 2008). After performing screening of the  
519 *rol* mutant, the worms were screened using fluorescence signals. After confirming the insertion via  
520 sequencing, CAL2221 was subjected to crossing experiments with CAL0941 to visualize dynein and  
521 histones simultaneously.

522

### 523 RNAi experiments

524 For the synthesis of double-stranded RNAs (dsRNAs), oligonucleotides containing T3 and T7  
525 promoters were used. The sequences of the oligonucleotides were the same as those available in  
526 PhenoBank (<https://worm.mpi-cbg.de/phenobank/cgi-bin/ProjectInfoPage.py>). The dsRNA  
527 sequences were amplified from the genomic DNA of the N2 strain. After amplification, the dsRNAs  
528 were synthesized from the products using T3 and T7 RNA polymerases (Promega, P2075, and  
529 P2083). The transcription products were incubated at 70 °C for 10 min and at 37 °C for 30 min for  
530 annealing. After annealing, the products were filtered using SUPREC™-01 (Takara, 9040). To inject  
531 the purified dsRNAs, young adult worms were placed on a thin layer of 2% agarose (Lonza, SeaKem  
532 LE agarose) on a 24 × 55-mm coverslip (Matsunami). After covering the worms with halocarbon oil  
533 (Sigma, H8898-50MK), the coverslip was mounted and analyzed using an inverted microscope  
534 (Axiovert 100, Carl Zeiss). The dsRNAs were injected into the worms using a microinjector  
535 (Eppendorf, FemtoJet). After the completion of injection, 5–10 µL of M9 buffer (22 mM KH<sub>2</sub>PO<sub>4</sub>,  
536 42 mM Na<sub>2</sub>HPO<sub>4</sub>, and 86 mM NaCl) was added to the oil to recover the worms. The worms were  
537 transferred to a new NGM plate with OP50 *E. coli* and were incubated at 22 °C for 44–48 h (*nud-2*),  
538 24–28 h (*tbb-2*), or 16–20 h (*ran-1* and *cdk-1*) before conducting observations.

539

## 540 **Construction and purification of recombinant proteins**

541 The full-length coding sequence of *nud-2* was amplified from the cDNA of the N2 strain using the  
542 KOD One PCR Master Mix (Toyobo, KMM-101). The amplified sequence was inserted into the  
543 pET17b vector (Invitrogen) together with the sequence of SBP-mCherry using seamless cloning with  
544 the NEBuilder HiFi DNA Assembly Master Mix (New England BioLabs, E2621). To construct the  
545 truncated fragments, unnecessary sequences were removed from the full-length constructs using  
546 seamless cloning. The plasmids were transformed into Rosetta2 (DE3) competent cells (Novagen,  
547 71397). The recombinant proteins were purified using SBP-tag and StrepTactin Sepharose. *E. coli*  
548 cells obtained from 500 mL culture were harvested using centrifugation for 10 min at 4800 rpm  
549 (Beckman, Allegra-30XR), and were subjected to freezing in liquid nitrogen. The collected cells  
550 were suspended in lysis buffer (50 mM HEPES-KOH, 150 mM NaCl, 1 mM EGTA, 10% (w/v)  
551 sucrose, and pH7.2) supplemented with the ProteoGuard EDTA-free protease inhibitor cocktail  
552 (Clontech, 635673). The cells in the suspended solution were sonicated using the Q125 sonicator  
553 (Qsonica) and the following settings: 60% amplitude, +4 °C water bath, and 1-s ON/1-s OFF pulses.  
554 The total sonication time was 10 min. The homogenized solution was centrifuged at 75,000 rpm for  
555 15 min (Beckman, TL100.3). The supernatant was loaded onto a StrepTactin Sepharose column with  
556 a volume of 1 mL, followed by washing with lysis buffer. The proteins were eluted with lysis buffer  
557 supplemented with 2.5 mM desthiobiotin. Protein concentrations were determined via the Bradford  
558 method using the TaKaRa Bradford Protein Assay Kit (Takara Bio, T9310A).

559

## 560 **Gonad injection of recombinant proteins or polymers**

561 Purified proteins or polymers were diluted using 1× PBS (Takara Bio, T900), and loaded into  
562 custom-made microneedles prepared with the P1000IVF micropipette puller (Sutter Instrument).  
563 Young adult worms were placed on a thin layer of 2% agarose (Lonza, SeaKem LE agarose)  
564 prepared on a 24 × 55-mm coverslip (Matsunami). After covering the worms with halocarbon oil, the  
565 coverslips were mounted and analyzed using the Axiovert100 inverted microscope (Carl Zeiss).  
566 Protein solutions were injected into the worms using the FemtoJet microinjector (Eppendorf). After  
567 the completion of injection, 5–10 μL of M9 buffer was added to release the worms. After the release,  
568 the worms were transferred to a new NGM plate and were incubated at 22 °C for at least 3 h for  
569 incorporation of the injected components into the embryos.

570

## 571 **Imaging of *C. elegans* early embryos**

572 Worms were dissected using a 0.75× egg salt buffer (118mM NaCl, 40mM KCl, 3.4mM CaCl<sub>2</sub>,  
573 3.4mM MgCl<sub>2</sub>, 5mM HEPES pH 7.2). The embryos from the dissected worms were mounted in  
574 0.75× egg salt buffer, which was placed on a 26 × 76-mm custom-made coverslip (Matsunami). To  
575 eliminate the effects of deformation, no coverslip was mounted on the embryos. Egg-mounted  
576 coverslips were set to a spinning-disk confocal fluorescent microscope consisting of the IX71  
577 inverted microscope (Olympus) and the CSU-X1 spinning-head (Yokogawa). The microscope was  
578 equipped with a 60× silicon-immersion objective lens (Olympus, UPlanSApo, 60x/1.30Sil) and a  
579 2.0× intermediate magnification lens. Images were acquired using an EM-CCD (Andor, iXon)  
580 managed by the NIS elements software (Nikon) at 10-s intervals. In single-slice acquisition, the  
581 exposure time was 180 ms for both the 488-nm and 561-nm channels. To acquire 3D images, a  
582 piezo-actuated microscope stage (PI) was used and the acquisition interval was set to 20 s. In the 3D  
583 observations, the exposure times were 120 ms for the 488-nm channel and 60 ms for the 561-nm  
584 channel. In the observations of nocodazole-treated embryos, worms were dissected using a 0.75× egg  
585 salt buffer supplemented with 10 µg/mL nocodazole (Fujifilm Wako, 140-08531). After dissection,  
586 the worms were mounted using the same buffer. The experimental room was air-conditioned and  
587 temperature was maintained at 21–23°C.

588

### 589 **Image analysis**

590 To analyze the images of *C. elegans* early embryos, the background intensity was subtracted, and  
591 photobleaching effect was corrected by assuming an exponential model. After preprocessing, the  
592 mean CI and mean NI values were measured to calculate the N/C ratio of the intensity. Mean CI was  
593 calculated by averaging the mean intensities measured in three circular regions with a 100-pixel  
594 diameter (13.6 µm) randomly placed in the early 1-cell stage embryos, which were in the stage  
595 before the growth of pronuclei. We selected this timing because all proteins observed showed  
596 relatively uniform subcellular distributions in the whole embryo. The calculated mean CI was used to  
597 determine the N/C ratio throughout the calculations. In the measurements of NIs, we manually  
598 selected the nuclear boundary using the signals of histones or accumulated proteins. In the  
599 measurement of LIN-5 and tubulin, which presented with strong signals at centrosomes, centrosomal  
600 signals were masked with a circular region with a 30-pixel diameter (4.09 µm).

601

### 602 **Statistical analyses**

603 All graphs were generated, and statistical analyses were performed using Prism v.7 (GraphPad). For  
604 all figures, the error bars represent the standard error of the mean. For all experiments, data were  
605 obtained from independent experiments using embryos that were independent of the worms.

606

607 **ACKNOWLEDGMENTS**

608 Some strains were provided by the *Caenorhabditis* Genetics Center funded by the NIH Office of  
609 Research Infrastructure Programs (P40 OD010440). We would like to thank Dr. Kei Saito (National  
610 Institute of Genetics) for reading the manuscript and for providing helpful comments. This work was  
611 supported by JSPS KAKENHI (grant numbers JP19K16094 to TT, JP18H02414 to AK, and  
612 JP18KK0202 to AK and KK).

613

614 **CONFLICT OF INTEREST**

615 The authors declare that they have no conflicts of interest regarding the contents of this article.

## 616 REFERENCES

- 617 Aguirre-Chen C, Bülow HE, Kaprielian Z (2011). *C. elegans* bcd-1, homolog of the Drosophila  
618 dynein accessory factor Bicaudal D, regulates the branching of PVD sensory neuron dendrites.  
619 *Development* 138, 507–518.
- 620 Askjaer P, Galy V, Hannak E, Mattaj IW (2002). Ran GTPase cycle and importins alpha and beta are  
621 essential for spindle formation and nuclear envelope assembly in living Caenorhabditis elegans  
622 embryos. *Mol Biol Cell* 13, 4355–4370.
- 623 Aumais JP, Williams SN, Luo W, Nishino M, Caldwell KA, Caldwell GA, Lin S-H, Yu-Lee, L-Y  
624 (2003). Role for NudC, a dynein-associated nuclear movement protein, in mitosis and cytokinesis. *J*  
625 *Cell Sci* 116, 1991–2003.
- 626 Bader JR, Vaughan KT (2010). Dynein at the kinetochore: timing, interactions, and functions. *Semin*  
627 *Cell Dev Biol* 21, 269–275.
- 628 Bamba C, Bobinnec Y, Fukuda M, Nishida E (2002). The GTPase Ran regulates chromosome  
629 positioning and nuclear envelope assembly in vivo. *Curr Biol* 12, 503–507.
- 630 Bradshaw NJ, Ogawa F, Antolin-Fontes B, Chubb JE, Carlyle BC, Christie S, Claessens A, Porteous  
631 DJ, Millar JK (2008). DISC1, PDE4B, and NDE1 at the centrosome and synapse. *Biochem Biophys*  
632 *Res Commun* 377, 1091–1096.
- 633 Cockell MM, Baumer K, Gönczy P (2004). *lis-1* is required for dynein-dependent cell division  
634 processes in *C. elegans* embryos. *J Cell Sci* 117, 4571–4582.
- 635 Cross RA, McAinsh A (2014). Prime movers: the mechanochemistry of mitotic kinesins. *Nat Rev*  
636 *Mol Cell Biol* 15, 257–271.
- 637 Derewe U et al. (2007). The structure of the coiled-coil domain of Ndel1 and the basis of its  
638 interaction with Lis1, the causal protein of Miller-Dieker lissencephaly. *Structure* 15, 1467–1481.
- 639 Dickinson DJ, Goldstein B (2016). CRISPR-based methods for Caenorhabditis elegans genome  
640 engineering. *Genetics* 202, 885–901.
- 641 Elshenawy MM, Kusakci E, Volz S, Baumbach J, Bullock SL, Yildiz A (2020). Lis1 activates  
642 dynein motility by modulating its pairing with dynactin. *Nat Cell Biol* 22, 570–578.

- 643 Feng Y, Olson EC, Stukenberg PT, Flanagan LA, Kirschner MW, Walsh, CA (2000). LIS1 regulates  
644 CNS lamination by interacting with mNudE, a central component of the centrosome. *Neuron* 28,  
645 665–679.
- 646 Galy V, Mattaj IW, Askjaer P (2003). *Caenorhabditis elegans* nucleoporins Nup93 and Nup205  
647 determine the limit of nuclear pore complex size exclusion in vivo. *Mol Biol Cell* 14, 5104–5115.
- 648 Gassmann R et al. (2008). A new mechanism controlling kinetochore-microtubule interactions  
649 revealed by comparison of two dynein-targeting components: SPDL-1 and the Rod/Zwilch/Zw10  
650 complex. *Genes Dev* 22, 2385–2399.
- 651 Gönczy P et al. (2000). Functional genomic analysis of cell division in *C. elegans* using RNAi of  
652 genes on chromosome III. *Nature* 408, 331–336.
- 653 Guo J, Yang Z, Song W, Chen Q, Wang F, Zhang Q, Zhu X (2006). Nudel contributes to  
654 microtubule anchoring at the mother centriole and is involved in both dynein-dependent and -  
655 independent centrosomal protein assembly. *Mol Biol Cell* 17, 680–689.
- 656 Hachet V, Canard C, Gönczy P (2007). Centrosomes promote timely mitotic entry in *C. elegans*  
657 embryos. *Dev Cell* 12, 531–541.
- 658 Hayashi H, Kimura K, Kimura A (2012). Localized accumulation of tubulin during semi-open  
659 mitosis in the *Caenorhabditis elegans* embryo. *Mol Biol Cell* 23, 1688–1699.
- 660 Heald R, Khodjakov A (2015). Thirty years of search and capture: the complex simplicity of mitotic  
661 spindle assembly. *J Cell Biol* 211, 1103–1111.
- 662 Heppert JK, Dickinson DJ, Pani AM, Higgins CD, Steward A, Ahringer J, Kuhn JR, Goldstein B  
663 (2016). Comparative assessment of fluorescent proteins for in vivo imaging in an animal model  
664 system. *Mol Biol Cell* 27, 3385–3394.
- 665 Heppert JK, Pani AM, Roberts AM, Dickinson DJ, Goldstein, B (2018). A CRISPR tagging-based  
666 screen reveals localized players in Wnt-directed asymmetric cell division. *Genetics* 208, 1147–1164.
- 667 Hirokawa N, Noda Y, Tan Y, Niwa S (2009). Kinesin superfamily motor proteins and intracellular  
668 transport. *Nat Rev Mol Cell Biol* 10, 682–696.
- 669 Htet ZM, Gillies JP, Baker RW, Leschziner AE, DeSantis ME, Reck-Peterson SL (2020). LIS1

- 670 promotes the formation of activated cytoplasmic dynein-1 complexes. *Nat Cell Biol* 22, 518–525.
- 671 Kardon JR, Vale RD (2009). Regulators of the cytoplasmic dynein motor. *Nat Rev Mol Cell Biol* 10,  
672 854–865.
- 673 King SM (2011). *Dyneins: Structure, Biology and Disease*, Academic Press.
- 674 Kiyomitsu T (2019). The cortical force-generating machinery: how cortical spindle-pulling forces are  
675 generated. *Curr Opin Cell Biol* 60, 1–8.
- 676 Kobayashi T, Morone N, Kashiwaga T, Oyamada H, Kurebayashi N, Murayama T (2008).  
677 Engineering a novel multifunctional green fluorescent protein tag for a wide variety of protein  
678 research. *PLoS One* 3, e3822.
- 679 Lee KK, Gruenbaum Y, Spann P, Liu J, Wilson KL (2000). *C. elegans* nuclear envelope proteins  
680 emerin, MAN1, lamin, and nucleoporins reveal unique timing of nuclear envelope breakdown during  
681 mitosis. *Mol Biol Cell* 11, 3089–3099.
- 682 Liang Y, Yu W, Li Y, Yang Z, Yan X, Huang Q, Zhu X (2004). Nudel functions in membrane traffic  
683 mainly through association with Lis1 and cytoplasmic dynein. *J Cell Biol* 164, 557–566.
- 684 Makarova M, Oliferenko S (2016). Mixing and matching nuclear envelope remodeling and spindle  
685 assembly strategies in the evolution of mitosis. *Curr Opin Cell Biol* 41, 43–50.
- 686 Malone CJ, Misner L, Le Bot N, Tsai M-C, Campbell JM, Ahringer J, White JG (2003). The *C.*  
687 *elegans* hook protein, ZYG-12, mediates the essential attachment between the centrosome and  
688 nucleus. *Cell* 115, 825–836.
- 689 Marzo MG, Griswold JM, Markus SM (2020). Pac1/LIS1 stabilizes an uninhibited conformation of  
690 dynein to coordinate its localization and activity. *Nat Cell Biol* 22, 559–569.
- 691 McKenney RJ, Huynh W, Tanenbaum ME, Bhabha G, Vale RD (2014). Activation of cytoplasmic  
692 dynein motility by dynactin-cargo adapter complexes. *Science* 345, 337–341.
- 693 McKenney RJ, Vershinin M, Kunwar A, Vallee RB, Gross SP (2010). LIS1 and NudE induce a  
694 persistent dynein force-producing state. *Cell* 141, 304–314.
- 695 Métivier M et al. (2021). *Drosophila* tubulin-specific chaperone E recruits tubulin around chromatin  
696 to promote mitotic spindle assembly. *Curr Biol* 31, 684–695.e6.



- 697 Mori D et al. (2007). NDEL1 phosphorylation by Aurora-A kinase is essential for centrosomal  
698 maturation, separation, and TACC3 recruitment. *Mol Cell Biol* 27, 352–367.
- 699 Niethammer M, Smith DS, Ayala R, Peng J, Ko J, Lee MS, Morabito M, Tsai LH (2000). NUDEL is  
700 a novel Cdk5 substrate that associates with LIS1 and cytoplasmic dynein. *Neuron* 28, 697–711.
- 701 Olenick MA, Holzbaur ELF (2019). Dynein activators and adaptors at a glance. *J Cell Sci* 132.
- 702 Pfister KK, Shah PR, Hummerich H, Russ A, Cotton J, Annuar AA, King SM, Fisher EMC (2006).  
703 Genetic analysis of the cytoplasmic dynein subunit families. *PLoS Genet* 2, e1.
- 704 Portegijs V, Fielmich L-E, Galli M, Schmidt R, Muñoz J, van Mourik T, Akhmanova A, Heck AJR,  
705 Boxem M, van den Heuvel S (2016). Multisite phosphorylation of NuMA-related LIN-5 controls  
706 mitotic spindle positioning in *C. elegans*. *PLoS Genet* 12, e1006291.
- 707 Portier N, Audhya A, Maddox PS, Green RA, Dammermann A, Desai A, Oegema K (2007). A  
708 microtubule-independent role for centrosomes and aurora a in nuclear envelope breakdown. *Dev Cell*  
709 12, 515–529.
- 710 Qiu R, Zhang J, Xiang X (2019). LIS1 regulates cargo-adaptor-mediated activation of dynein by  
711 overcoming its autoinhibition in vivo. *J Cell Biol* 218, 3630–3646.
- 712 Raaijmakers JA, Medema RH (2014). Function and regulation of dynein in mitotic chromosome  
713 segregation. *Chromosoma* 123, 407–422.
- 714 Raaijmakers JA, Tanenbaum ME, Medema RH (2013). Systematic dissection of dynein regulators in  
715 mitosis. *J Cell Biol* 201, 201–215.
- 716 Reck-Peterson SL, Redwine WB, Vale RD, Carter AP (2018). The cytoplasmic dynein transport  
717 machinery and its many cargoes. *Nat Rev Mol Cell Biol* 19, 382–398.
- 718 Roberts AJ, Kon T, Knight PJ, Sutoh K, Burgess SA (2013). Functions and mechanics of dynein  
719 motor proteins. *Nat Rev Mol Cell Biol* 14, 713–726.
- 720 Sasaki S, Shionoya A, Ishida M, Gambello MJ, Yingling J, Wynshaw-Boris A, Hirotsune S (2000).  
721 A LIS1/NUDEL/cytoplasmic dynein heavy chain complex in the developing and adult nervous  
722 system. *Neuron* 28, 681–696.
- 723 Schlager MA, Hoang HT, Urnavicius L, Bullock SL, Carter AP (2014). In vitro reconstitution of a

- 724 highly processive recombinant human dynein complex. *EMBO J* 33, 1855–1868.
- 725 Schmidt R, Fielmich L-E, Grigoriev I, Katrukha EA, Akhmanova A, van den Heuvel S (2017). Two  
726 populations of cytoplasmic dynein contribute to spindle positioning in *C. elegans* embryos. *J Cell*  
727 *Biol* 216, 2777–2793.
- 728 Schweizer N, Pawar N, Weiss M, Maiato H (2015). An organelle-exclusion envelope assists mitosis  
729 and underlies distinct molecular crowding in the spindle region. *J Cell Biol* 210, 695–704.
- 730 Simões PA, Celestino R, Carvalho AX, Gassmann R (2018). NudE regulates dynein at kinetochores  
731 but is dispensable for other dynein functions in the *C. elegans* early embryo. *J Cell Sci* 131,  
732 jcs212159.
- 733 Soares DC et al. (2012). The mitosis and neurodevelopment proteins NDE1 and NDEL1 form  
734 dimers, tetramers, and polymers with a folded back structure in solution. *J Biol Chem* 287, 32381–  
735 32393.
- 736 Torisawa T, Ichikawa M, Furuta A, Saito K, Oiwa K, Kojima H, Toyoshima YY, Furuta K (2014).  
737 Autoinhibition and cooperative activation mechanisms of cytoplasmic dynein. *Nat Cell Biol* 16,  
738 1118–1124.
- 739 Torisawa T, Kimura A (2020). The Generation of Dynein Networks by Multi-Layered Regulation  
740 and Their Implication in Cell Division. *Front Cell Dev Biol* 8, 22.
- 741 Torisawa T, Nakayama A, Furuta K, Yamada M, Hirotsune S, Toyoshima YY (2011). Functional  
742 dissection of LIS1 and NDEL1 towards understanding the molecular mechanisms of cytoplasmic  
743 dynein regulation. *J Biol Chem* 286, 1959–1965.
- 744 Toya M, Terasawa M, Nagata K, Iida Y, Sugimoto A (2011). A kinase-independent role for Aurora  
745 A in the assembly of mitotic spindle microtubules in *Caenorhabditis elegans* embryos. *Nat Cell Biol*  
746 13, 708–714.
- 747 Toyo-Oka K et al. (2005). Recruitment of katanin p60 by phosphorylated NDEL1, an LIS1  
748 interacting protein, is essential for mitotic cell division and neuronal migration. *Hum Mol Genet* 14,  
749 3113–3128.
- 750 Tzur YB, Gruenbaum Y (2000-2013). Nuclear envelope breakdown and reassembly in *C. elegans*:  
751 evolutionary aspects of lamina structure and function. In: Madame Curie Bioscience Database

- 752 [Internet]. Austin (TX): Landes Bioscience. Available from:  
753 <https://www.ncbi.nlm.nih.gov/books/NBK6297/>
- 754 Updike DL, Hachey SJ, Kreher J, Strome S (2011). P granules extend the nuclear pore complex  
755 environment in the *C. elegans* germ line. *J Cell Biol* 192, 939–948.
- 756 Vaisberg EA, Koonce MP, McIntosh JR (1993). Cytoplasmic dynein plays a role in mammalian  
757 mitotic spindle formation. *J Cell Biol* 123, 849–858.
- 758 Wang S, Ketcham SA, Schön A, Goodman B, Wang Y, Yates J, 3rd, Freire E, Schroer TA, Zheng Y  
759 (2013). Nudel/NudE and Lis1 promote dynein and dynactin interaction in the context of spindle  
760 morphogenesis. *Mol Biol Cell* 24, 3522–3533.
- 761 Yamada M, Toba S, Yoshida Y, Haratani K, Mori D, Yano Y, Mimori-Kiyosue Y, Nakamura T, Itoh  
762 K, Fushiki S, Setou M, Wynshaw-Boris A, Torisawa T, Toyoshima YY, Hirotsune S (2008). LIS1  
763 and NDEL1 coordinate the plus-end-directed transport of cytoplasmic dynein. *EMBO J* 27, 2471–  
764 2483.
- 765 Yan X, Li F, Liang Y, Shen Y, Zhao X, Huang Q, Zhu X (2003). Human Nudel and NudE as  
766 regulators of cytoplasmic dynein in poleward protein transport along the mitotic spindle. *Mol Cell*  
767 *Biol* 23, 1239–1250.
- 768 Yao C, Rath U, Maiato H, Sharp D, Girton J, Johansen KM, Johansen, J (2012). A nuclear-derived  
769 proteinaceous matrix embeds the microtubule spindle apparatus during mitosis. *Mol Biol Cell* 23,  
770 3532–3541.
- 771 Zhang K, Foster HE, Rondelet A, Lacey SE, Bahi-Buisson N, Bird AW, Carter AP (2017). Cryo-EM  
772 reveals how human cytoplasmic dynein is auto-inhibited and activated. *Cell* 169, 1303–1314.e18.
- 773 Zylkiewicz E, Kijańska M, Choi W-C, Derewenda U, Derewenda ZS, Stukenberg PT (2011). The N-  
774 terminal coiled-coil of Ndel1 is a regulated scaffold that recruits LIS1 to dynein. *J Cell Biol* 192,  
775 433–445.
- 776
- 777

778 **TABLE**

779 **Table 1.** Quantification of the accumulation of dynein and the regulatory proteins

|              | <b>Cytoplasmic<br/>intensity (CI)</b> | <b>Nuclear<br/>intensity (NI)</b> | <b>Maximum N/C<br/>ratio</b> | <b>n</b> |
|--------------|---------------------------------------|-----------------------------------|------------------------------|----------|
|              | $\times 10^2$ a. u.                   | $\times 10^2$ a. u.               |                              |          |
| <b>NUD-2</b> | 1.4 $\pm$ 0.2                         | 6.3 $\pm$ 1.9                     | 4.6 $\pm$ 0.6                | 8        |
| <b>LIS-1</b> | 9.0 $\pm$ 1.7                         | 13.1 $\pm$ 2.6                    | 1.5 $\pm$ 0.1                | 11       |
| <b>LIN-5</b> | 5.9 $\pm$ 1.1                         | 10.2 $\pm$ 2.3                    | 1.7 $\pm$ 0.2                | 10       |
| <b>DNC-1</b> | 3.4 $\pm$ 0.7                         | 5.7 $\pm$ 1.8                     | 1.6 $\pm$ 0.2                | 11       |
| <b>DHC-1</b> | 2.1 $\pm$ 0.6                         | 3.7 $\pm$ 1.2                     | 1.7 $\pm$ 0.1                | 9        |

780

781 **FIGURES**

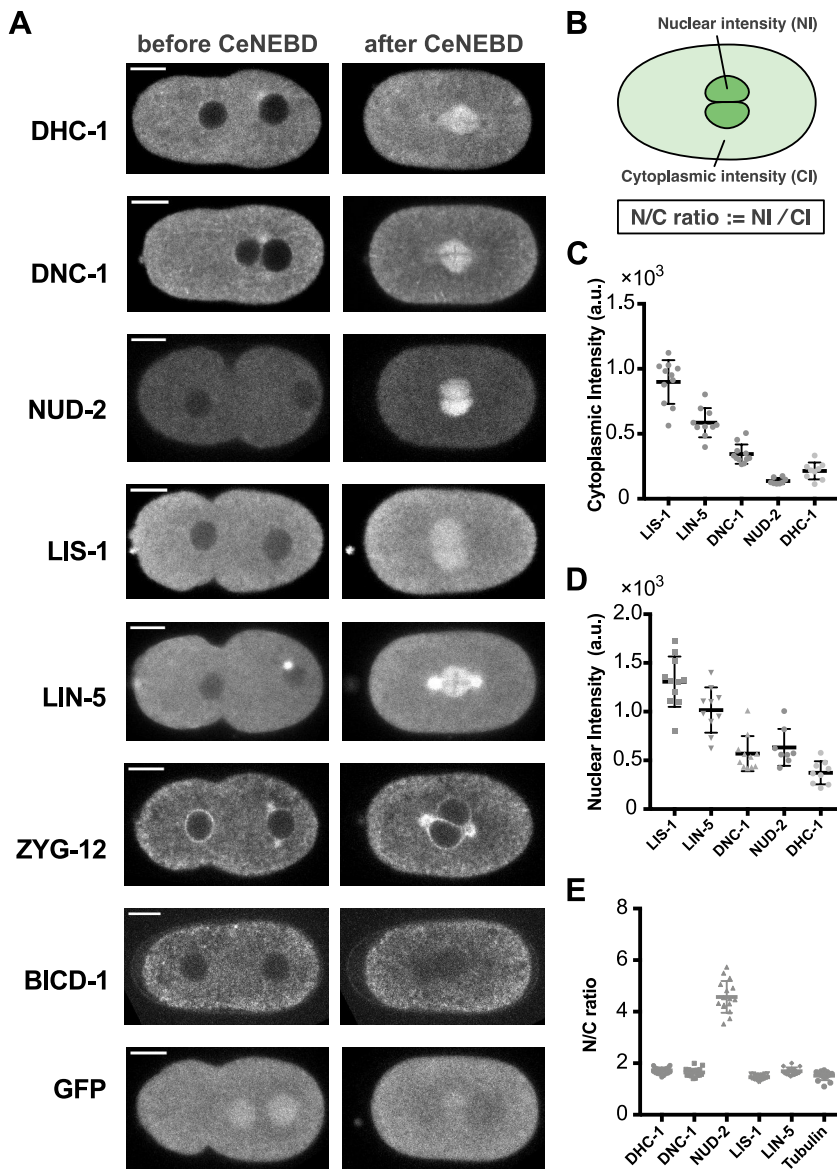

782  
 783 **Figure 1.** Observations of the temporal dynamics of dynein and its regulatory proteins during the 1st mitosis  
 784 of *Caenorhabditis elegans* early embryos. (A) Typical single-plane time-lapse images showing the cellular  
 785 localization of dynein and its regulatory proteins before and after CeNEBD. Scale bars, 10  $\mu$ m. (B) Schematic  
 786 representation of quantification of accumulation phenomenon. Nuclear intensity (NI) and Cytoplasmic  
 787 intensity (CI) indicate the mean intensity of the nuclear region and cytoplasmic region, respectively. (C-E)  
 788 Quantification of the accumulated amount of dynein, dynactin, LIS-1, NUD-2, and LIN-5. (C) The mean  
 789 cytoplasmic intensity. (D) The maximum nuclear (spindle) intensity. (E) The maximum N/C ratio (i.e., the  
 790 intensity in the nuclear/spindle region divided by the cytoplasmic intensity).

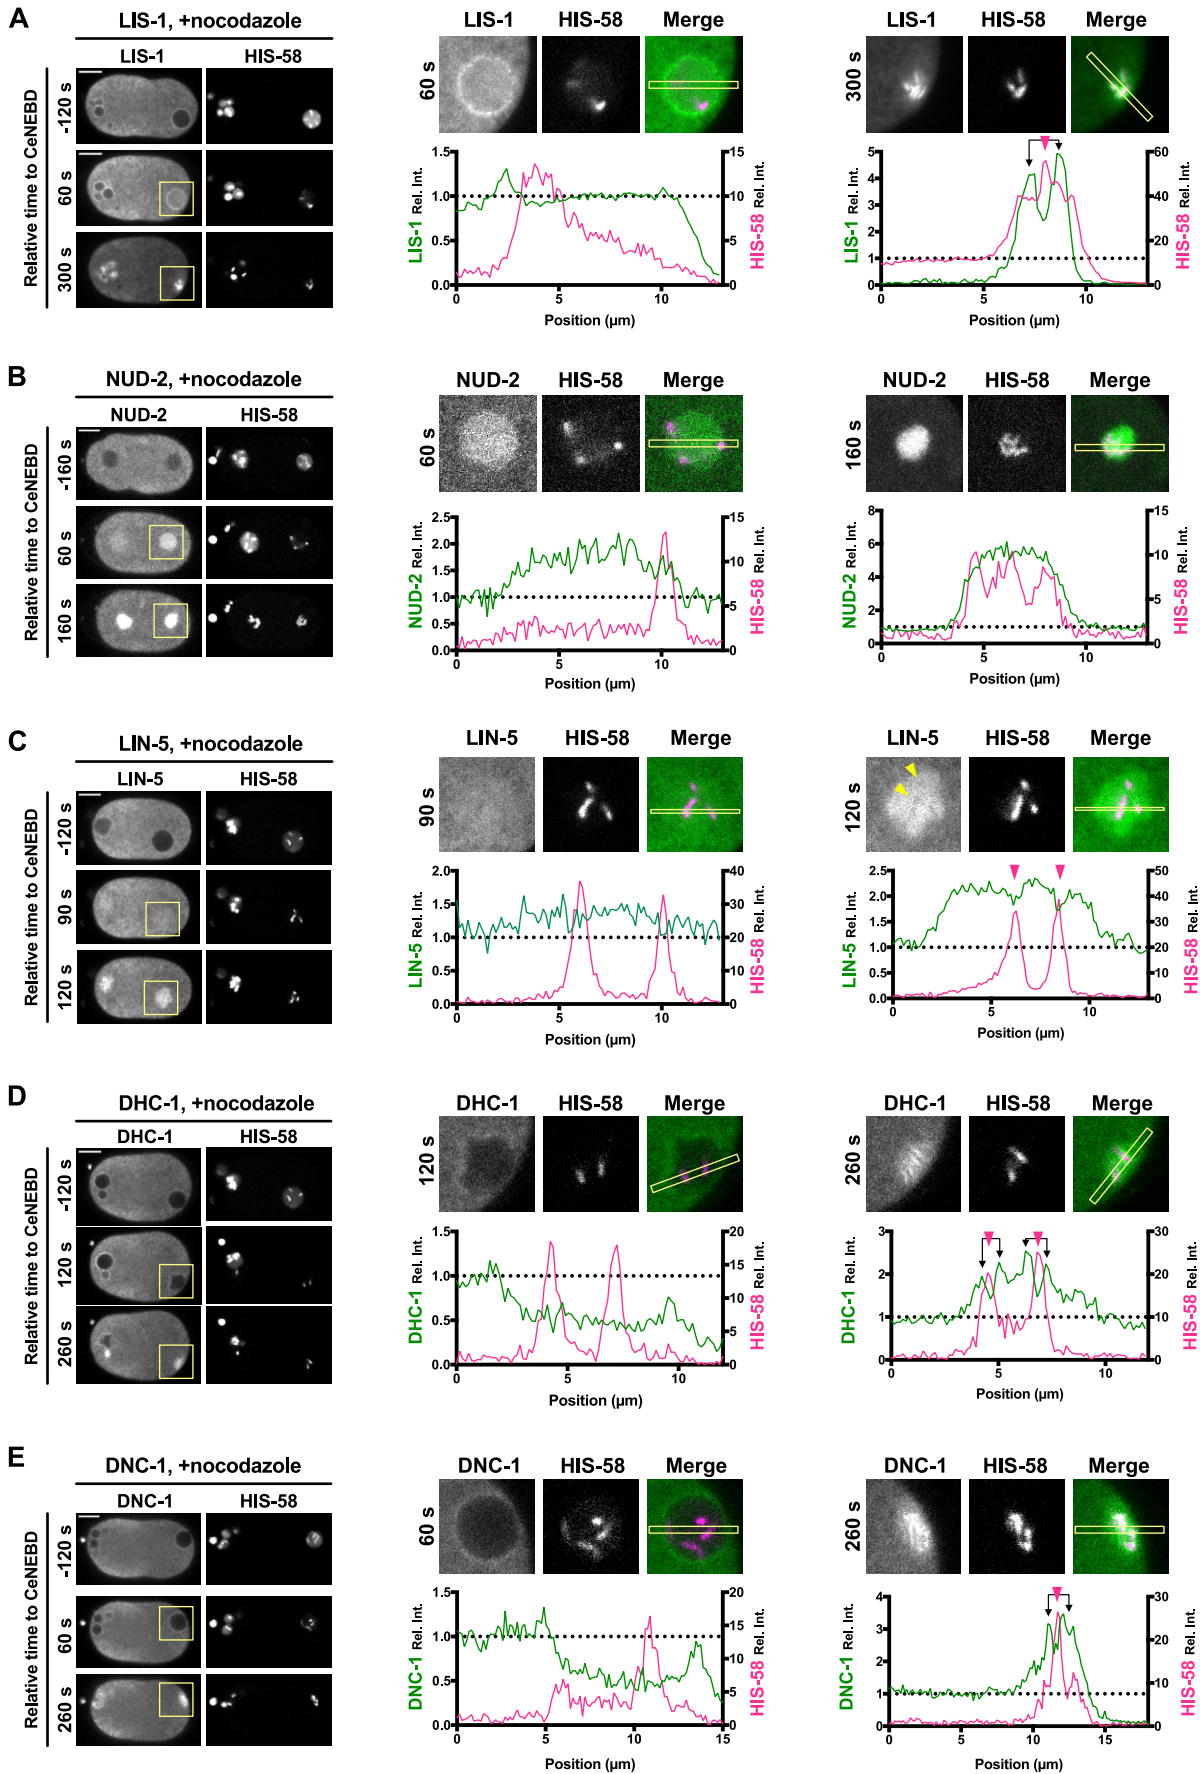

792 **Figure 2.** Variations in accumulation sites of dynein and its regulatory proteins. Spatial distribution of LIS-1  
793 (A), NUD-2 (B), LIN-5 (C), dynein (D), and dynactin (E), in the presence of 10  $\mu\text{g}/\text{mL}$  of nocodazole are  
794 presented by depicting the single-plane time-lapse images (left), the magnified images (center), and the  
795 intensity profiles (right). Loss of microtubules via nocodazole treatment leads to the defects in pronuclear  
796 migration and meeting because these processes are mediated by microtubule-based motors. It results in the  
797 delay in CeNEBD of oocyte pronuclei due to the lack of triggering signal arising from centrosome-associated  
798 molecules. The left side of the image corresponds to the anterior. The magnified images have been cropped  
799 from the yellow rectangles in the images depicting the corresponding time. Intensity profiles have been  
800 calculated in the rectangles indicated in the magnified images. The magenta arrowheads denote the peak of  
801 histone signals, and the black arrow lines indicate the signal peak of dynein or the regulatory proteins near the  
802 histone peaks. The scale bars indicate 10  $\mu\text{m}$ .

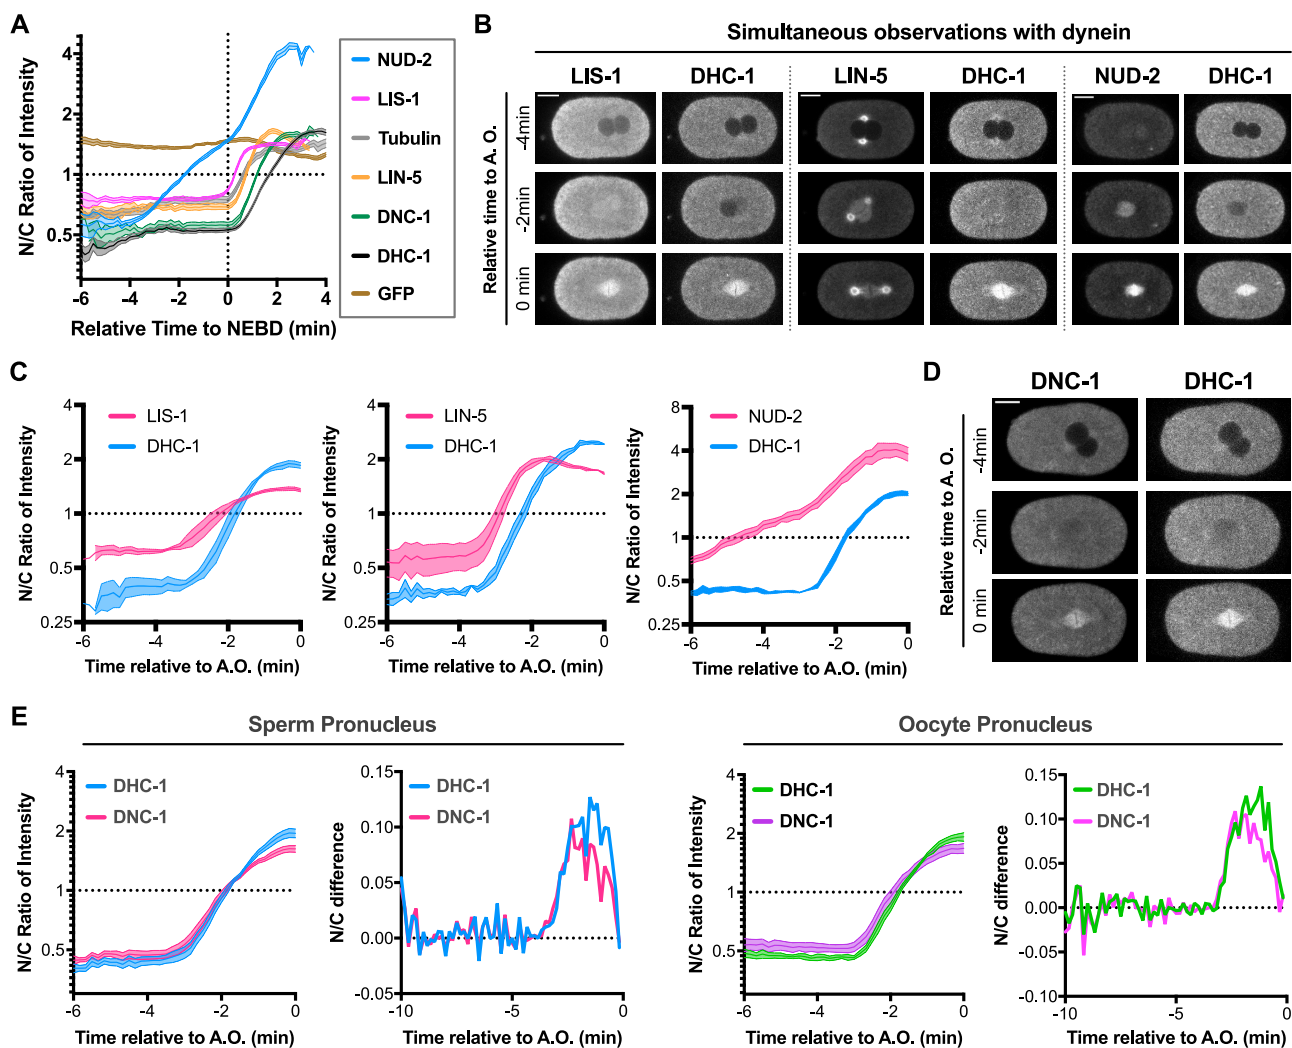

803

804 **Figure 3.** Temporal variations in the accumulation. (A) The plots show the time series of the intensity ratio in  
 805 the spindle regions to the cytoplasm (N/C ratio). The initiation time of CeNEBD, the time origin, has been  
 806 determined using the intensity decay of free histone (HIS-58) in the nucleus. The numbers of nuclei analyzed  
 807 were 16 from 8 embryos (NUD-2), 19 from 11 embryos (LIS-1), 16 from 12 embryos (tubulin), 15 from 10  
 808 embryos (LIN-5), 18 from 11 embryos (dynactin), and 26 from 14 embryos (dynein). The mean and SE values  
 809 are shown. (B and C) Typical single-plane time-lapse images (B) and time series of the N/C ratio (C) were  
 810 obtained via the simultaneous observations of dynein with LIS-1, LIN-5, and NUD-2. (C) The right side of the  
 811 image corresponds to the anterior. The scale bars indicate 10  $\mu$ m. Owing to the lack of information on histone  
 812 signal, the time origin was set to anaphase onset, which was determined via the segregation of chromosome-  
 813 localized signals of dynein. (C) The N/C ratio used to perform calculations based on sperm pronuclei is  
 814 shown. The number of nuclei analyzed was 4 from 4 embryos (LIS-1), 3 from 3 embryos (LIN-5), and 4 from  
 815 4 embryos (NUD-2). (D and E) Typical single-plane time-lapse images (D) and time series of the N/C ratio  
 816 (E) obtained via the simultaneous observation of dynein and dynactin. (E) The plots show the time series of  
 817 the N/C ratio and its time difference. The numbers of nuclei analyzed were 8 from 8 embryos (sperm  
 818 pronuclei) and 7 from 8 embryos (oocyte pronuclei).



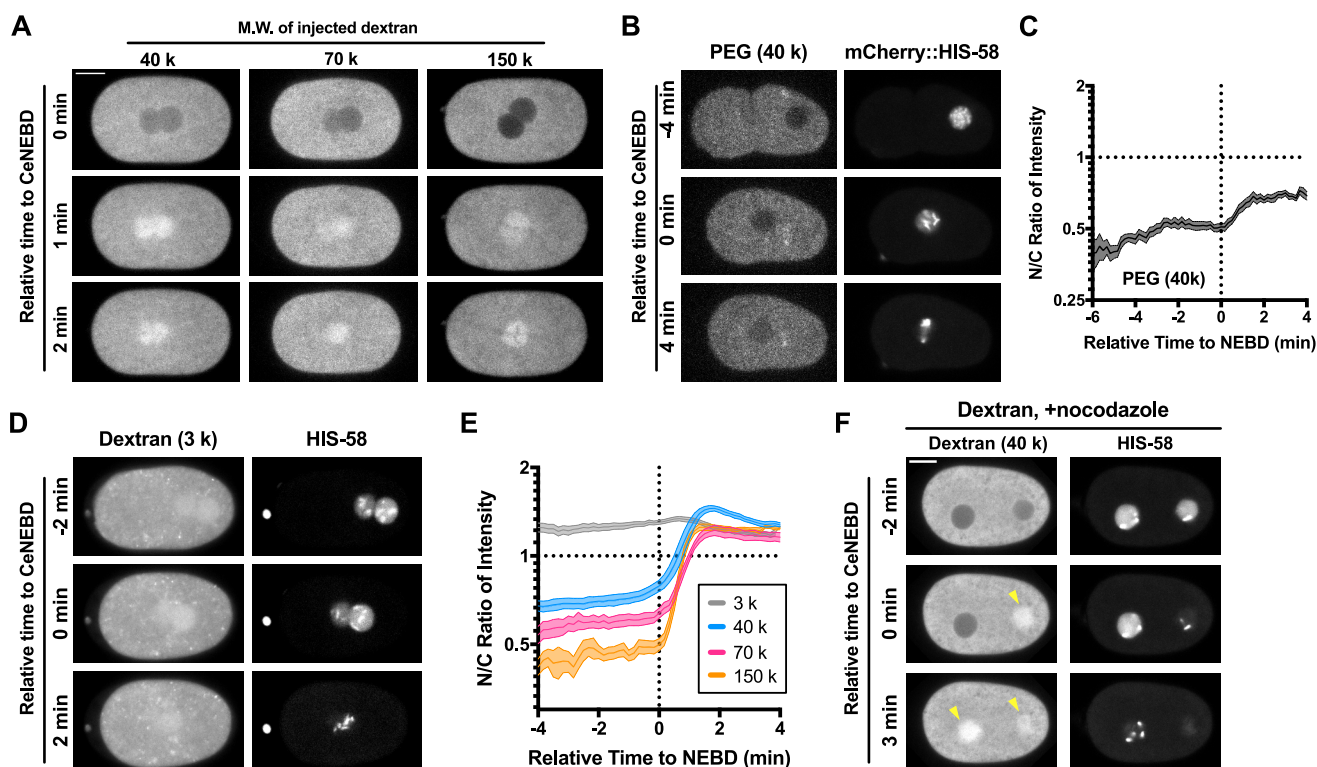

819

820 **Figure 4.** Accumulation dynamics of polymers incorporated into the embryos. (A) Typical single-plane time-lapse  
 821 images showing the temporal dynamics of dextrans incorporated through the gonad injection. The  
 822 molecular weight of the injected dextran is indicated above. The left side of the image corresponds to the  
 823 anterior. The scale bars indicate 10  $\mu$ m. (B) Typical single-plane time-lapse images showing the temporal  
 824 dynamics of mPEG (40 k). The left side of the image corresponds to the anterior. The scale bar indicates 10  
 825  $\mu$ m. (C) Time series of the N/C ratio of mPEG (40 k). The number of analyzed pronuclei was 14 from 10  
 826 embryos. Mean and SEM are shown. (D) Typical single-plane time-lapse images showing the temporal  
 827 dynamics of dextran (3 k). The left side of the image corresponds to the anterior. (E) Time series of the N/C  
 828 ratio of the injected dextrans (3k, 40 k, 70 k, and 150 k). The numbers of pronuclei analyzed were 9 from 6  
 829 embryos (3 k), 7 from 4 embryos (40 k), 8 from 4 embryos (70 k), and 9 from 6 embryos (150 k). Mean and  
 830 SEM are shown (F) Typical single-plane time-lapse images showing the accumulation of dextran (40 k) in the  
 831 presence of 10  $\mu$ g/mL nocodazole. The scale bar indicates 10  $\mu$ m. The left side of the image corresponds to  
 832 the anterior.

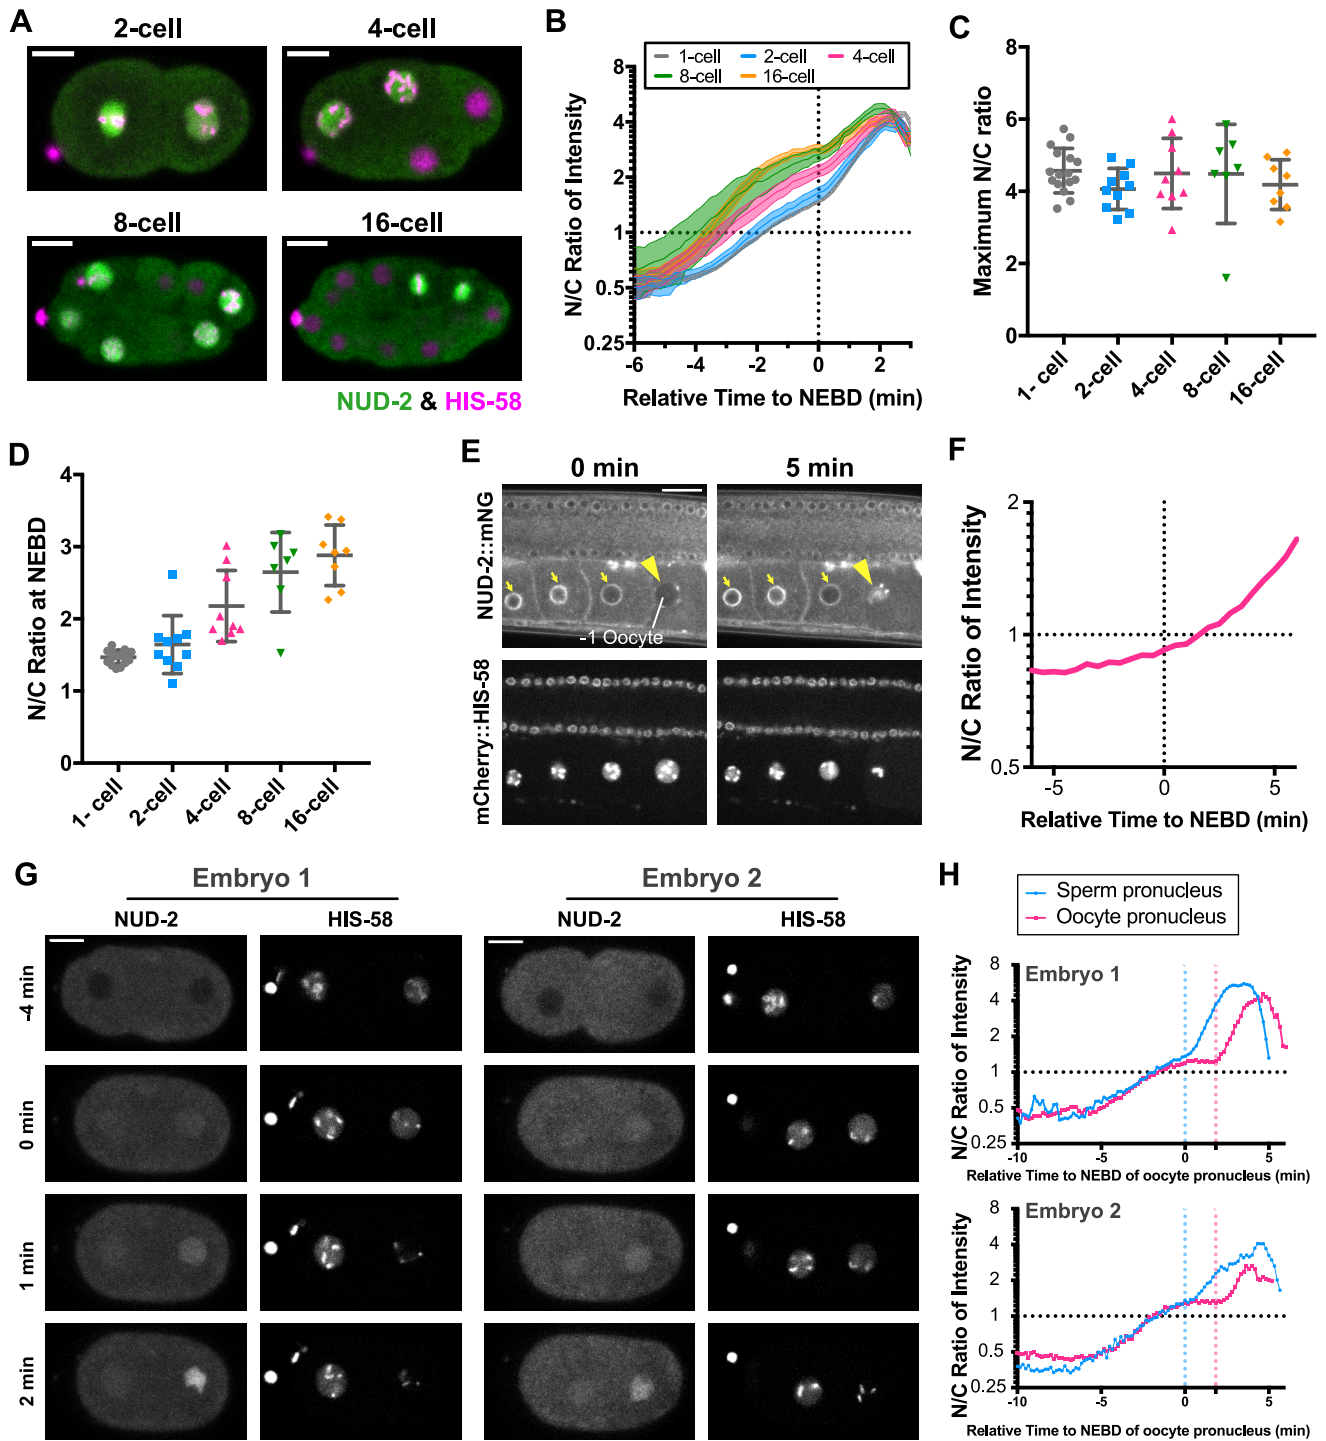

833

834

835

836

837

838

839

840

**Figure 5.** Accumulation patterns of endogenous NUD-2 in various contexts. (A) Single plane time-lapse images showing the signal of NUD-2::mNG (green) and mCherry::HIS-58 (magenta) in 2–16-cell stage embryos. The right side in the images corresponds to the anterior. The scale bars indicate 10  $\mu$ m. (B) Time series of the N/C ratio of NUD-2 in 2-cell (blue), 4-cell (red), 8-cell (green), and 16-cell (orange) embryos. For comparison, the time series of NUD-2 in 1-cell stage embryos is shown by using the gray line, which indicates the same data as indicated in Figure 2. (C) Maximum N/C ratio in 1–16-cell stage embryos. (D) The N/C ratio measured at the time of CeNEBD. (E) Typical single plane time-lapse

841 images depicting NUD-2 in the germline of an adult worm. The yellow arrowheads denote the nucleus of the -  
842 1 oocyte, and the yellow arrows indicate the NUD-2 localizations at nuclear membranes. The times relative to  
843 CeNEBD of the -1 oocyte are indicated above. The scale bar indicates 20  $\mu\text{m}$ . (F) Time series of the N/C ratio  
844 of NUD-2 in the -1 oocyte shown in (E). (G) Typical single-plane time-lapse images showing the temporal  
845 dynamics of NUD-2 in the presence of 10  $\mu\text{g}/\text{mL}$  nocodazole. The scale bars indicate 10  $\mu\text{m}$ . (H) Time series  
846 of N/C ratio of NUD-2 in the nocodazole-treated embryos. The N/C ratios in sperm and oocyte pronuclei are  
847 depicted by using the blue lines and the magenta lines. The vertical dashed lines indicate the initiation of  
848 CeNEBD of pronuclei.

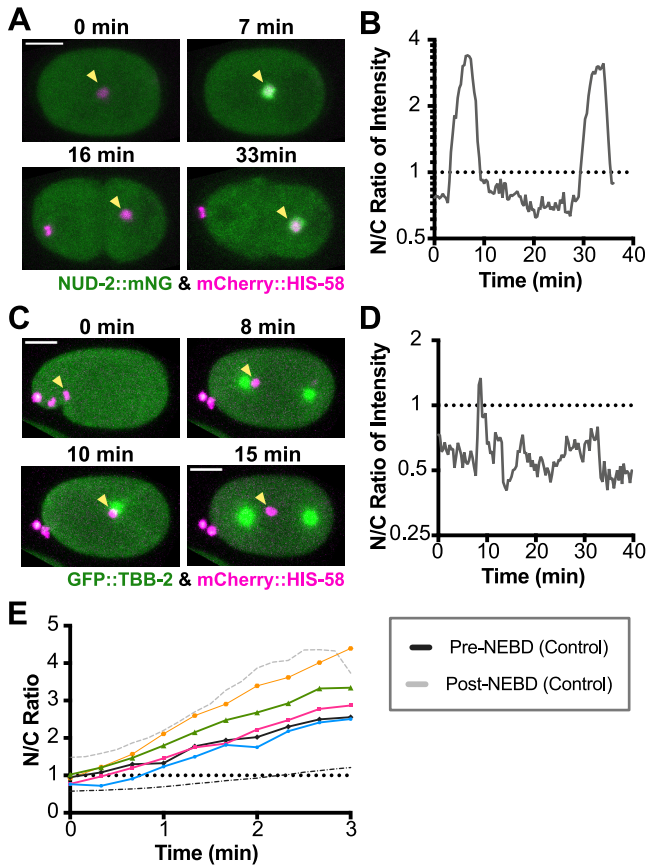

849

850

851

852

853

854

855

856

857

858

859

860

861

862

863

864

865

866

**Figure 6.** Accumulation of NUD-2 exhibits a distinct molecular dependency from tubulin. (A) Maximum projection images showing the temporal dynamics of NUD-2 in the RAN-1-depleted embryo. Under *ran-1* (RNAi) conditions, the sizes of embryo and nucleus reduced, and the defect in cytokinesis was observed. Although it was difficult to detect the precise timing of CeNEBD, the cyclic increase in NUD-2 signals was confirmed. The left side of the image corresponds to the anterior. The scale bar indicates 10  $\mu$ m. (B) Time series of N/C ratio of NUD-2 in the RAN-1-depleted embryos shown in (A). The intensity of NUD-2 in the region indicated by using the yellow arrowheads was measured. The origin of time was set to the initial time of the observation. Each peak seemed to demonstrate a rapid single-phase increase from the N/C ratio below 1. (C) Maximum projection images showing the temporal dynamics of TBB-2 (tubulin) in the RAN-1-depleted embryo. The left side of the image corresponds to the anterior. (D) Time series of N/C ratio of TBB-2 in the RAN-1-depleted embryos shown in (C). The intensity of NUD-2 in the region indicated by using the yellow arrowheads was measured. The origin of time was set to the initial time of the observation. (E) Comparison of temporal dynamics of the N/C ratio between the unperturbed condition and *ran-1* (RNAi) conditions. The time series data of N/C ratio during the rapid increase phase in *ran-1* (RNAi) embryos are shown by using the colored lines, while the black line and the gray line show the time series data of pre- and post-NEBD accumulations, respectively. The origin of time was set as the initial time of each accumulation, not the timing of CeNEBD because it was difficult to detect CeNEBD in the RAN-1-depleted embryos.

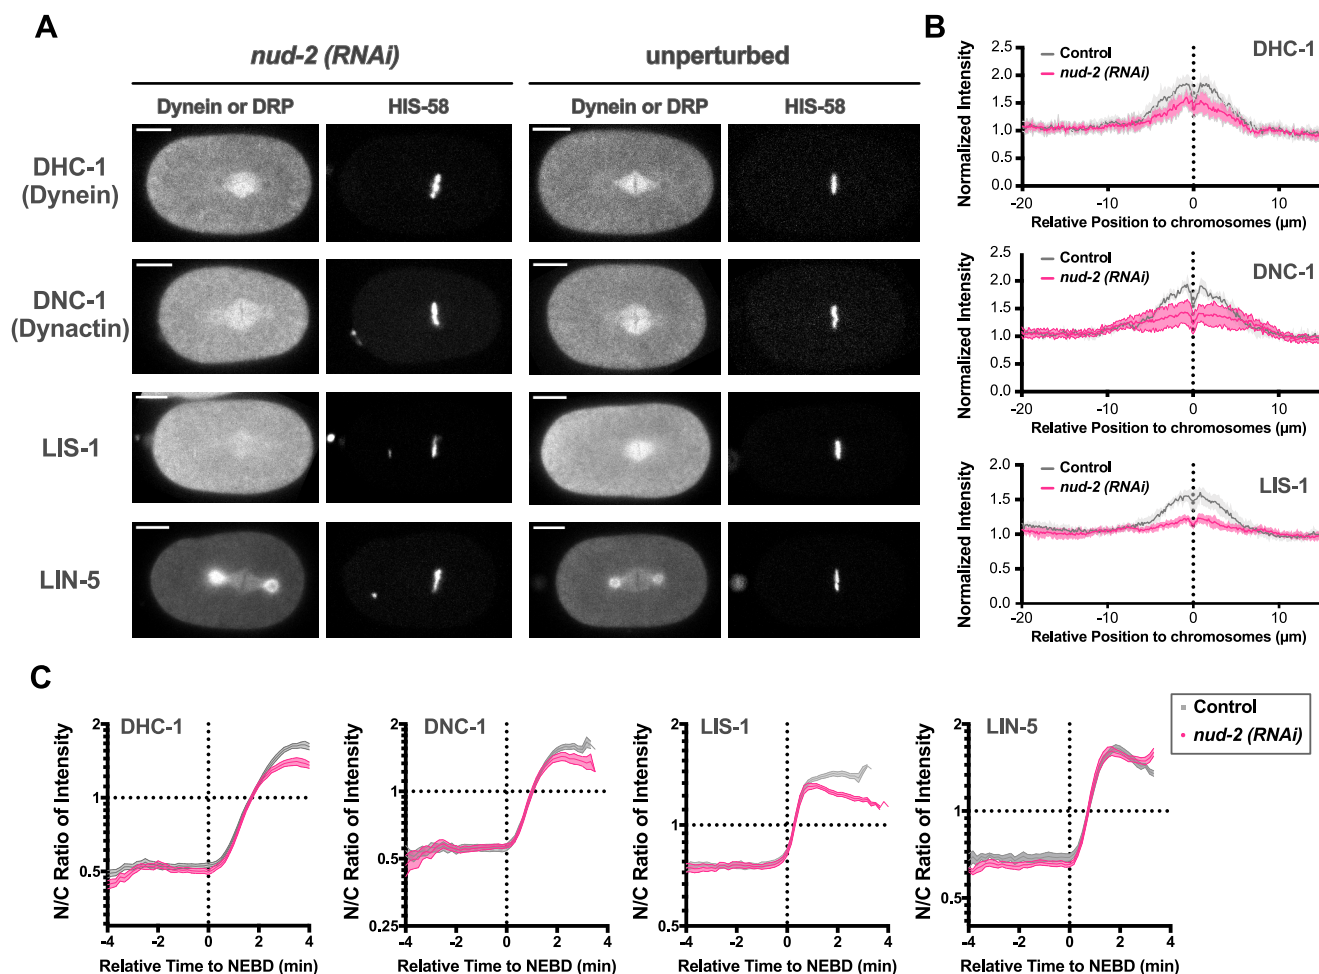

867

868

869

870

871

872

873

874

875

876

877

878

879

880

881

882

**Figure 7.** NUD-2 depletion reduces the retained amount of dynein and its regulatory proteins. (A) Typical single-plane images of dynein, dynactin, LIS-1, and LIN-5 showing the comparison between the *nud-2* (RNAi) embryos and the unperturbed embryos. The images of embryos at the anaphase onset were acquired. The left side of the image corresponds to the anterior. The scale bars indicate 10  $\mu\text{m}$ . (B) The averaged intensity profiles of dynein (top), dynactin (middle), and LIS-1 (bottom) were derived from both the unperturbed (control) and the *nud-2* (RNAi) embryos. The profiles measured before the anaphase onset are shown. The magenta lines indicate the profiles derived from the *nud-2* (RNAi) embryos, whereas the gray lines indicate the profiles derived from the control embryos. For all analyzed proteins, a reduction in intensity was observed around the chromosomes. (C) Temporal dynamics of N/C ratio of dynein and its regulatory proteins under the unperturbed or *nud-2* (RNAi) conditions. The gray dots indicate the time series under the unperturbed conditions, whereas the magenta dots indicate the time series in *nud-2* (RNAi) embryos. Before the initiation of a rapid accumulation phase occurred around CeNEBD, there was no evident difference between the controls and the *nud-2* (RNAi) conditions. All analyzed proteins except LIN-5 showed a decay of N/C ratio after the rapid accumulation. The numbers of nuclei analyzed were 22 from 12 embryos (dynein), 13 from 8 embryos (dynactin), 13 from 7 embryos (LIS-1), and 15 from 9 embryos (LIN-5).

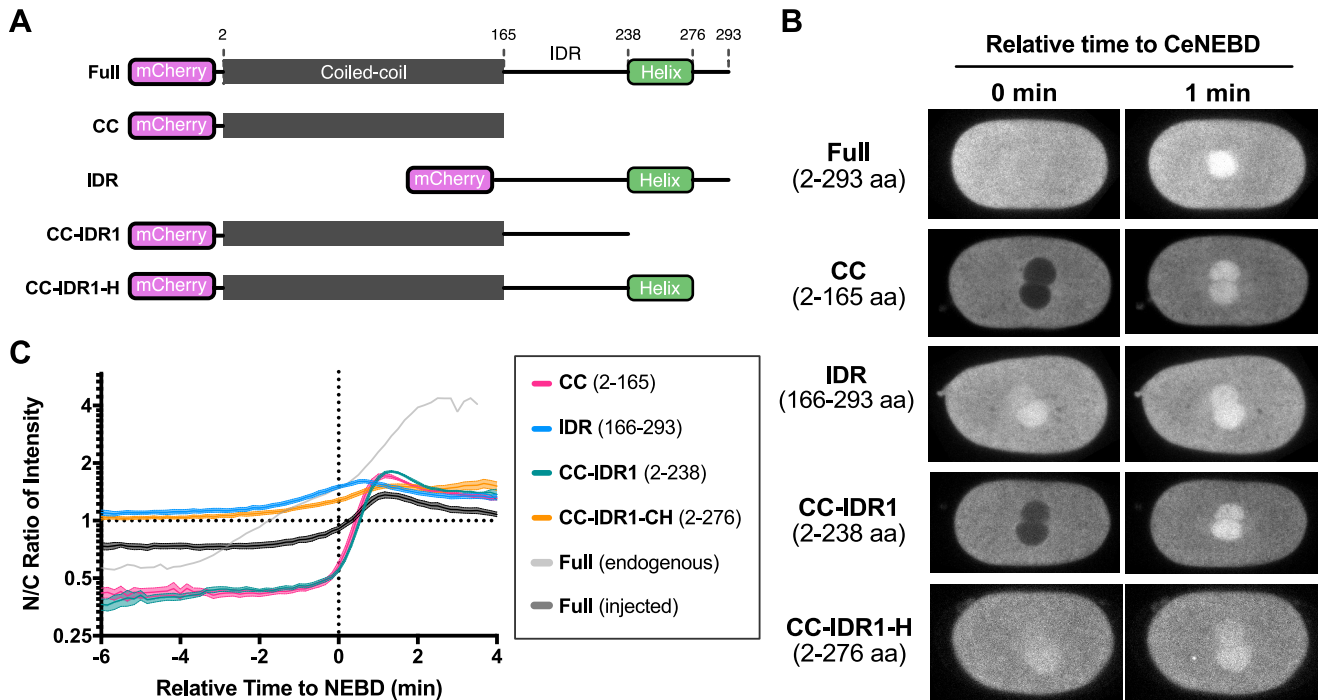

883

884

885

886

887

888

889

890

891

**Figure 8.** The C-terminal helix of NUD-2 is necessary for pre-NEBD accumulation. (A) Schematic representation of the recombinant NUD-2 proteins used for the injection experiments. The fragments were purified from *E. coli* cells. The predicted coiled-coil region is depicted as gray boxes. IDR indicates an intrinsically disordered region. (B) Typical single-plane time-lapse images showing the temporal dynamics of the NUD-2 fragments. The left sides of the images correspond to the anterior. The scale bars indicate 10  $\mu$ m. (C) Time series of the N/C ratio of the recombinant NUD-2 proteins. The numbers of nuclei analyzed were 10 from 6 embryos (Full), 9 from 6 embryos (CC), 15 from 9 embryos (IDR), 16 from 9 embryos (CC-IDR1), and 10 from 6 embryos. Mean and SE values are shown.

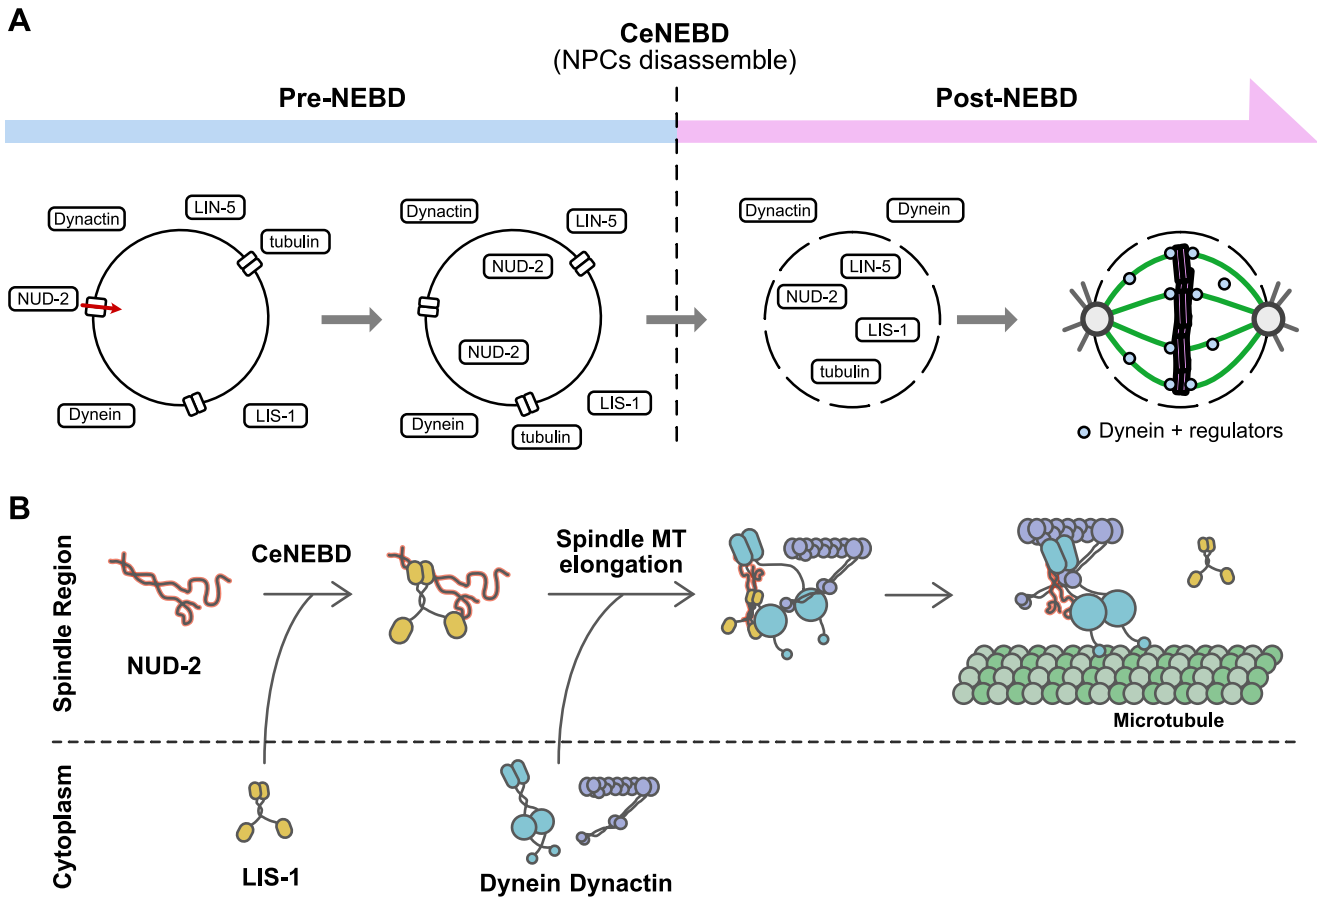

Source: https://www.biorxiv.org/content/biorxiv/early/2021/09/15/2021.09.14.460385.full.pdf
